1 **Trikafta therapy alters the CF lung mucus metabolome reshaping microbiome niche space**

2

3 Lauren M. Sosinski<sup>1</sup>, Christian Martin H.<sup>1</sup>, Kerri A. Neugebauer<sup>1</sup>, Lydia-Ann J. Ghuneim<sup>1</sup>, Douglas V.  
4 Guzior<sup>1,2</sup>, Alicia Castillo-Bahena<sup>3</sup>, Jenna Mielke<sup>4</sup>, Ryan Thomas<sup>5</sup>, Marc McClelland<sup>3</sup>, Doug Conrad<sup>4</sup> and  
5 Robert A. Quinn<sup>1\*</sup>

6

7 <sup>1</sup>Department of Biochemistry and Molecular Biology, Michigan State University, East Lansing, MI, USA.

8 <sup>2</sup>Department of Microbiology and Molecular Genetics, Michigan State University, East Lansing, MI,  
9 USA.

10 <sup>3</sup>Spectrum Health, Grand Rapids, MI, USA

11 <sup>4</sup>Department of Medicine, University of California San Diego, La Jolla, CA

12 <sup>5</sup>Department of Pediatrics and Human Development, Michigan State University, East Lansing, MI, USA

13

14 \* To whom the correspondence should be addressed: Robert Quinn. Department of Biochemistry and  
15 Molecular Biology, Michigan State University, East Lansing, Michigan, USA. Email:

16 [quinnrob@msu.edu](mailto:quinnrob@msu.edu)

17

18 Author contributions: LS, CMH, KN, LJG, DVG generated data; LS, CMH, KN and RAQ analyzed data,  
19 ACB, JM collected samples; MM, RT and DC recruited patients; LM, CMH, KN, and RAQ wrote the  
20 paper; RAQ obtained funding for the project

21

22 Sources of support: NIH R01AI145925

23 Running head: TRIKAFTA Microbiome and Metabolome Dynamics in CF

24

25

26

27

28

29

30 **Abstract**

31 **Background:** Novel small molecule therapies for cystic fibrosis (CF) are showing promising efficacy  
32 and becoming more widely available since recent FDA approval. The newest of these is a triple therapy  
33 of Elexacaftor-Tezacaftor-Ivacaftor (ETI, Trikafta®). Little is known about how these drugs will affect  
34 polymicrobial lung infections, which are the leading cause of morbidity and mortality among people with  
35 CF (pwCF).

36 **Methods:** we analyzed the sputum microbiome and metabolome from pwCF (n=24) before and after  
37 ETI therapy using 16S rRNA gene amplicon sequencing and untargeted metabolomics.

38 **Results:** The lung microbiome diversity, particularly its evenness, was increased ( $p = 0.044$ ) and the  
39 microbiome profiles were different between individuals before and after therapy (PERMANOVA  $F=1.92$ ,  
40  $p=0.044$ ). Despite these changes, the microbiomes were more similar within an individual than across  
41 the sampled population. There were no specific microbial taxa that were different in abundance before  
42 and after therapy, but collectively, the log-ratio of anaerobes to classic CF pathogens significantly  
43 decreased. The sputum metabolome also showed changes due to ETI. Beta-diversity increased after  
44 therapy (PERMANOVA  $F=4.22$ ,  $p=0.022$ ) and was characterized by greater variation across subjects  
45 while on treatment. This significant difference in the metabolome was driven by a decrease in peptides,  
46 amino acids, and metabolites from the kynurenine pathway. Metabolism of the three small molecules  
47 that make up ETI was extensive, including previously uncharacterized structural modifications.

48 **Conclusions:** This study shows that ETI therapy affects both the microbiome and metabolome of  
49 airway mucus. This effect was stronger on sputum biochemistry, which may reflect changing niche  
50 spaces for microbial residency in lung mucus as the drug's effects take hold, which then leads to  
51 changing microbiology.

52 **Funding:** This project was funded by a National Institute of Allergy and Infectious Disease Grant  
53 R01AI145925

54 **Keywords:** Cystic Fibrosis, sputum, microbiome, metabolome, Trikafta

55

## 56 Introduction

57 Cystic fibrosis (CF) is an autosomal recessive disorder caused by mutations in the cystic fibrosis  
58 transmembrane conductance regulator (CFTR) gene. CFTR is a cAMP-regulated ion channel used for  
59 the transport anions across epithelial cells (1). Mutations in this gene cause a thickening of mucosal  
60 secretions, primarily in the respiratory and gastrointestinal systems, and chronic polymicrobial infection  
61 of the airways (1). Common clinical representations of this disease include, but are not limited to,  
62 increased polymicrobial infections, infertility, decreased lung function, and pancreatic insufficiency (1).  
63 Pancreatic sufficiency is inherently linked to the specific mutation class, but other aspects of CF  
64 pathology have unclear links to genotype (2, 3). It is clear however, that those with severe disease,  
65 especially the delF508 mutation, are plagued by chronic lung infection throughout their lifetime (4).

66 The lung microbiome of people with CF (pwCF) has been well characterized and includes  
67 bacteria, viruses, and fungi (5–7). Studies of sputum expectorated from the airways have demonstrated  
68 that the CF lung microbiome diversity decreases as the disease progresses over time, becoming  
69 dominated by opportunistic pathogens, such as *Pseudomonas aeruginosa* (4, 8). Thickened mucus  
70 within the lungs allows for these pathogens to form a biofilm and thrive (9). The chemical composition  
71 of this matrix has been shown to mainly include DNA, amino acids, peptides, antibiotics, inflammatory  
72 lipids, and a myriad of small molecules from host, microbial, and xenobiotic sources (10–14).

73 In November 2019, a new triple therapy drug Elexacaftor-Tezacaftor-Ivacaftor (ETI, Trikafta®)  
74 was approved by the United States Food and Drug Administration (FDA) for the treatment of CF (15).  
75 ETI is composed of three different compounds: Tezacaftor, Elexacaftor, and Ivacaftor (16). People with  
76 at least one copy of the F508del mutation, which is the most common mutation across CF patients, are  
77 eligible to take ETI. Studies from clinical trials and data available since approval have shown that the  
78 treatment is providing remarkable improvements in lung function and other disease symptoms (17, 18).  
79 Little is known, however, about how this new therapy will affect the CF lung microbiome and  
80 metabolome.

81 In this study, sputum samples from pwCF (n=24) were collected before and after therapy (within  
82 one year of FDA approval) and analyzed using an integrated multi-omics approach including 16S rRNA  
83 amplicon sequencing and LC-MS/MS untargeted metabolomics. Changes in both microbiome and  
84 metabolome were identified and indicate a significant shift in the niche space of airway mucus and its  
85 microbial occupancy from ETI therapy.

## 86 Methods

87 Further detail available in supplemental methods.

88 **Sample Collection.** Sputum samples were collected during routine clinical visits from adult pwCF (>18  
89 years) at two separate CF clinics (patient details table S1). Samples were obtained from the most  
90 recent clinical visit prior to ETI administration and the most recent visit after ETI administration if  
91 sputum production was possible. Ethical approval for the collections at the University of California San  
92 Diego adult CF clinic was obtained from the UCSD Human Research Protections Program Institutional  
93 Review Board under protocol #160078. Institutional review board approval was also provided for the  
94 collections at the Spectrum Health adult CF clinic in Grand Rapids, MI by the Spectrum Health Human  
95 Research Protection Program Office of the Institutional Review Board under IRB #2018-438.

96 **DNA Extraction, qPCR, and 16S rRNA single amplicon sequencing.** A Qiagen® PowerSoil® DNA  
97 extraction kit was used to extract DNA from the sputum samples following standard protocol. PCR  
98 amplification was then performed using 27F and 1492R primers targeting the bacterial 16S rRNA gene  
99 to test for DNA amplification quality. Bacterial 16S rRNA V4 amplicon sequencing was performed with  
100 primers 515f/806r on an Illumina® MiSeq® at the Michigan State University Sequencing Core. The raw  
101 sequences were processed using QIITA ([qiita.ucsd.edu](http://qiita.ucsd.edu)) (19), which is driven by QIIME2 algorithms  
102 (20), and quality filtered to generate amplicon sequence variants (ASVs) through the deblur method  
103 (21). ASVs in the microbiome data were classified as ‘classic CF pathogens’ or ‘anaerobes’ based on  
104 the methods of Raghuvanshi *et al.* (2020) and Carmody *et al.* (2018) (22, 23). The specific ASVs and  
105 their classifications are available in table S2. qPCR was executed using universal 16S primers (43) and  
106 Applied Biosystems SYBR Green PCR Master Mix with three technical replicates were obtained for  
107 each sample. The microbiome data is publicly available at the Qiita repository under study #13507.

108  
109 **Metabolomics.** Organic metabolite extraction was performed by adding twice the sample volume of  
110 chilled 100% methanol, vortexing briefly, and incubating at room temperature for 2 hours. Samples  
111 were then centrifuged at 10,000 x g and the supernatant was collected. Methanolic extracts were  
112 analyzed on a Thermo Q-Exactive Hybrid Quadrupole-Orbitrap mass spectrometer coupled to a  
113 Vanquish ultra-high-performance liquid chromatography system. All raw files were converted to  
114 .mzXML format and then processed with MZmine 2.53 software (24), GNPS molecular networking (25)  
115 and SIRIUS (26). MZmine 2 parameters are available in the supplementary information (Table S3). The  
116 network job is available at  
117 <https://gnps.ucsd.edu/ProteoSAFe/status.jsp?task=c700397169ff447490f764c34abb5abd> and the  
118 mass spectrometry data were deposited on public repository [massive.ucsd.edu](https://massive.ucsd.edu) under MassIVE ID  
119 [MSV000087364](https://massive.ucsd.edu/MSV000087364).

120

121 **Statistical Analysis.** Statistical approaches for both the microbiome and metabolome data were  
122 similar, due to the inherent structural similarity of the multivariate data sets. Normality of the different  
123 quantitative measures was first tested using a Shapiro-Wilk (SW) test in order to determine appropriate  
124 statistical methods. If the data was normally distributed, a paired dependent means t-test (DM t-test)  
125 was used. Otherwise, a Wilcoxon signed-rank test (WSRT) was used. Alpha-diversity was calculated  
126 for both datasets using the Shannon index. Beta-diversity measures were calculated using the  
127 weighted UniFrac distance for the microbiome and Bray-Curtis distance for the metabolome. Beta-  
128 diversity was visualized for both datasets using principal coordinates analysis (PCoA) and the EMPeror  
129 software (27). Beta-diversity clustering significance pre- and post-ETI were tested using a  
130 Permutational Multivariate Analysis of Variance (PERMANOVA) method with 999 permutations. Cross  
131 population beta-diversity comparisons were done between pwCF before ETI therapy, after therapy,  
132 across the whole dataset, and within individuals pre- and post-therapy.

133 To identify metabolite and microbial drivers of the difference pre- and post-therapy, a random  
134 forest (RF) machine learning approach was used via the randomForest package in R (28). The top 50  
135 variables of importance were further explored. As all individual metabolite and microbiome abundance  
136 data were not considered normally distributed, statistical significance for individual microbial and  
137 metabolite changes before and after ETI treatment were calculated using the WRST. The p-values  
138 were adjusted for multiple comparisons using the Benjamini-Hochberg method.

139 Microbe and metabolite association vectors were calculated using mmvec (29). Detail of the  
140 mmvec parameters and analysis is available in the online supplement.

141

## 142 **Results**

143

144 **Microbiome and Metabolome Diversity Changes from ETI Treatment.** Shannon diversity and  
145 number of ASVs of the microbiome showed an increase between samples collected before and after  
146 ETI treatment, but this did not reach statistical significance (Shannon SW normality  $p=0.238$ , WSRT  
147  $p=0.062$ ; Number of ASVs SW normality  $p=0.0043$ , DM t-test  $p=0.12$ , Fig. 1a). The Pielou evenness,  
148 however, was significantly higher post-therapy than before ETI (SW normality  $p=0.074$ , WSRT  
149  $p=0.044$ ). The metabolome did not show a significant change in Shannon index after ETI therapy (SW  
150  $p=0.0017$ , DM t-test,  $p=0.45$ , Fig. 1b) or evenness (Pielou evenness SW  $p=0.13$ , DM t-test  $p=0.30$ ).  
151 However, the number of molecular features did decrease after therapy (SW  $p=0.0027$  DM t-test  
152  $p=0.010$ ). Collectively, this alpha-diversity analysis demonstrates that new ASVs were not being  
153 introduced into the sputum microbiome, but rather became more even with previously present taxa. In

154 regard to the alpha-diversity of the metabolome, there was a decrease in the total number of  
155 metabolites present.

156 PCoA plots were used to visualize beta-diversity differences between samples of the two data  
157 types (Fig. 1c, d). In both the microbiome and metabolome, there was a cluster of more similar samples  
158 and a spread along the first and second axis indicating samples with greater diversity. PERMANOVA  
159 testing showed that the microbiome profile of the sputum samples changed after ETI treatment  
160 ( $p=0.044$ ). The metabolome profile also changed significantly after treatment ( $p=0.002$ ), with a stronger  
161 metric of difference in the metabolome compared to the microbiome (F-value=1.92 microbiome, F-  
162 value=3.12 metabolome, Fig. 1c, d). There was statistically significant movement along the first  
163 principal coordinate axis after ETI therapy for both the microbiome (SW test  $p=0.02$ , DM t-test  
164  $p=0.0027$ ) and the metabolome (SW  $p=0.0011$ , DM t-test  $p=0.00071$ ) indicating that changes in these  
165 measures occurred similarly within this beta-diversity space. There was no significant change along the  
166 second axis. The beta-diversity differences among samples were also compared before, between, and  
167 after ETI treatment across subjects and within subjects (SW normality on beta-diversity distributions  
168 microbiome  $p=1.4 \times 10^{-15}$ , metabolome  $p=2.2 \times 10^{-16}$ ). The microbiome showed the smallest change  
169 within subjects before and after therapy than across subjects at any period, indicating that although the  
170 microbiome profiles change significantly (Fig. 1e), there was still more similarity within an individual  
171 before and after therapy than across the population no matter the treatment category. The metabolome  
172 beta-diversity comparisons showed different trends than the microbiome. The largest beta-diversity in  
173 metabolite profiles was seen across patients in samples collected after therapy, signifying that the  
174 chemical makeup of sputum becomes far more varied across people once administered ETI (Fig. 1f). In  
175 contrast, the metabolomes were the most similar across subjects prior to ETI therapy, indicating that  
176 sputum metabolite profiles were relatively similar prior to ETI administration, but varied greatly across  
177 individuals after treatment.

178

179 **Microbial Changes After ETI Treatment.** A random forest classification was used to determine how  
180 well the microbiome data reflected the pre- or post-treatment groups and to rank the ASVs by their  
181 contribution to that classification. Overall, the random forest model poorly classified the microbiome  
182 data with an error rate of 44.7%. *Veillonella parvula* and *Staphylococcus* sp. were ASVs with strong  
183 classifiers (Table S4) with a high overall abundance. However, none of the ranked ASVs were  
184 significantly different between pre- and post-treatment samples after correction for false-discovery  
185 (Benjamini-Hochberg corrected, WSRT  $p>0.05$ ). The ASV representing *Pseudomonas* showed  
186 dynamic changes in some individuals, but it was not significantly different in the overall paired data (Fig.  
187 2). Similarly, at the family level, there was no significant difference before and after therapy following

188 false discovery rate correction. We also summed the abundance of all 'CF pathogens' and 'anaerobes'  
189 (as described in table S2) and compared the log-ratio of pathogens/anaerobes, as described by  
190 Raghuvanshi *et al.* (2020) (22), and found it significantly decreased following ETI therapy (SW  $p =$   
191 0.233, WSRT  $p = 0.013$ , Fig. 2).

192 A qPCR assay using universal primers for the bacterial 16S rRNA gene (43) was used to  
193 calculate the total number of rRNA copies/mL of sputum pre- and post-therapy. The mean prior to  
194 therapy was  $1.17 \times 10^9$  copies/mL and after therapy was  $7.62 \times 10^8$  copies/mL. This difference was not  
195 statistically significant but did show a decreasing trend (SW  $p = 0.0027$ , DM t-test  $p = 0.061$ , Fig. 2).

196

197 **Metabolite Changes After ETI Treatment.** Annotated metabolites were first grouped into molecular  
198 families and summed to determine overall changes. This analysis showed the major metabolomic  
199 signature due to ETI therapy was a decrease in peptides and amino acids. Though phosphocholine and  
200 phosphoethanolamine abundance did not change before and after ETI, peptide and amino acid  
201 abundance significantly decreased (Fig. 3a). This demonstrates an overall change in the relative  
202 abundance of this compound class, while other classes remained static.

203 A random forest machine learning classification was used to assess how well the complete  
204 metabolomic data reflected changes after ETI therapy. The out-of-bag error rate of the classification  
205 was 22.92% indicating that there was a metabolomic signal for ETI therapy, but not all samples were  
206 correctly classified as pre- or post-treatment. The importance of each metabolite in the construction of  
207 the random forest model was produced, noting the impact of each metabolite on differentiating pre- and  
208 post-treatment groups (Table S5). Of the 50 most important classifiers, 13 were annotated in the GNPS  
209 database and of those, 10 were annotated as amino acids or peptides. These were primarily  
210 dipeptides, including Phe-Glu, Ile-Leu, Glu-Val, and Ser-Phe, as well as the amino acid tryptophan; all  
211 of which significantly decreased after ETI therapy (Fig 1b). Molecular network analysis (Fig. 3c) showed  
212 a diverse set of peptides that were more abundant prior to ETI therapy. Metabolites from the  
213 kynurenine pathway (which includes tryptophan) were also identified as strong classifiers in the model.  
214 Kynurenine, formylkynurenine, and indole abundance significantly decreased after ETI therapy (Fig.  
215 3b). The *P. aeruginosa* siderophore pyochelin was detected in only 10 of the 24 patients. Comparing  
216 pyochelin abundance within those 10 individuals showed that it significantly decreased after ETI  
217 therapy as well (Fig. 3b). Though commonly detected in CF sputum with the metabolomics methods  
218 used here, other *P. aeruginosa* specialized metabolites were not detected in this study, except for one  
219 quinolone (NHQ) that was detected in 6 samples.

220

221 **Trikafta Metabolism in CF Mucus.** ETI is a triple therapy of the compounds Ivacaftor, Elexacaftor, and  
222 Tezacaftor. All three drugs were identified in the sputum metabolome by MS/MS analysis with similar  
223 fragmentation behavior to that described by Reyes-Ortega *et al.* (2020) (30). This included the known  
224 and unknown metabolized products of the parent drugs with related MS/MS spectra (Fig. 4). Ivacaftor  
225 had extensive metabolism revealed by molecular networking with the parent drug having six related  
226 nodes with unique retention times. Two of these are known, M1 and M6, as hydroxymethyl ivacaftor  
227 and ivacaftor carboxylate, respectively. Other modifications of the compounds were also seen,  
228 including further hydroxylations and carboxylations. Tezacaftor metabolism was also identified. This  
229 included dehydrogenation (metabolite M1,  $m/z$  519.1400,  $C_{26}H_{26}F_3N_2O_6+H^+$ ). Also detected, but not  
230 shown, was a phosphorylated metabolite ( $m/z$  599.1401,  $C_{26}H_{27}F_3N_2O_9P+H^+$ ) and a known glucuronate  
231 (metabolite M3, Fig. 4a). Elexacaftor exhibited only one metabolic transformation – the loss of a methyl  
232 group on its pyrazole ring (Fig. 4).

233 Ivacaftor and Tezacaftor were detected in sputum samples both prior to and after ETI  
234 administration. These two compounds were released as therapies in prior formulations of CFTR  
235 correctors, likely explaining their presence. Elexacaftor, the next generation corrector unique to ETI,  
236 was present in sputum after its prescription as expected. However, one subject unexpectedly had  
237 Elexacaftor present in their lung sputum prior to clinical knowledge of administration of ETI. The  
238 presence of Ivacaftor and Tezacaftor in the sputum of pwCF prior to administration of ETI led to the  
239 investigation of whether or not the presence of previously approved correctors/potentiators in sputum  
240 prior to administration of ETI may have buffered the microbiome dynamics observed. Ivacaftor (a  
241 component of Kalydeco®, Orkambi®, and Symdeko®) was found in 11 of the 24 patients prior to ETI  
242 therapy. There was no significant difference in the alpha or beta-diversity changes between subjects  
243 that had Ivacaftor in their sputum prior to ETI and those that did not ( $p>0.05$ , Fig. S1). This indicates  
244 that prior CFTR corrector/potentiator therapy was not contributing significantly to the overall changes  
245 seen with ETI in this study, allowing these changes to be definitively attributed to this specific triple  
246 therapy

247  
248 **Microbiome/Metabolite Associations Through ETI Therapy.** To associate microbiome and  
249 metabolome dynamics across the dataset, we employed mmvec. This is a novel algorithm robust to the  
250 challenges of compositionality of omics datasets that calculates conditional probabilities of the  
251 association between all ASVs in the microbiome data with all metabolite features. The overall neural  
252 network showed a strong association between a changing microbiome and metabolome (Fig. S2).  
253 Additionally, the biplot of the mmvec algorithm enabled visualization of the microbiome vectors  
254 associated with the metabolomic space. In the biplot, a clear separation in vector directionality was



255 found between pathogen and anaerobe associations with the metabolome. This indicates that the  
256 metabolites that change in association pathogens are not the same metabolites that associate with  
257 changing anaerobes. Drivers of the metabolite changes associated with pathogens were mostly  
258 peptides (Fig. 5a); those same peptides shown to be decreasing after ETI therapy. Plotting the  
259 conditional probabilities of each peptide with the mean of all pathogens and all anaerobes in the  
260 dataset showed that the peptides were significantly associated with pathogens (WSRT  $p < 0.001$ ) (Fig.  
261 5b). Kynurenine, another metabolite found to decrease with ETI therapy, was most strongly associated  
262 with pathogens. This analysis indicates the decrease of peptides and kynurenine in sputum samples  
263 collected from pwCF is associated with a decrease in the relative abundance of pathogens (Fig. 5c).

## 264 Discussion

265 This study assessed the multi-omic changes in sputum from pwCF after administration of the  
266 novel CF triple therapy ETI. This promising new therapy has shown significant improvement in lung  
267 function and symptom measures of pwCF in clinical trials with great potential to improve the lives of  
268 these individuals (15, 16). Improving CFTR function is a major goal of ETI therapy as it is the underlying  
269 cause of CF. However, many adult patients have been living with persistent lung infections and an  
270 evolving microbiome for decades. Promising as the treatment is, it is mostly unknown how the therapy  
271 will affect lung infections and the chemistry of sputum. This is of paramount importance; if the microbial  
272 infections in the lungs of pwCF do not clear and/or change favorably, then the full benefits of the  
273 therapy may not be realized. Preliminary studies of other CFTR modulators and correctors, specifically  
274 Ivacaftor which has received the most attention due to having the earliest FDA approval, have shown  
275 some changes in microbial diversity measures with treatment (31), specifically in the gut (32, 33), but  
276 most studies find little change in the airway microbiome (33–36). The addition of CFTR correctors, such  
277 as Lumacaftor, have shown an increase in microbial diversity in the CF airways (37), but other studies  
278 also show less marked responses (38). This study, to our knowledge, is the first to look specifically at  
279 the microbiome and metabolome changes resulting from ETI therapy (which includes the new highly  
280 effective potentiator Elexacaftor). Effects of the treatment were seen in both the microbiome and the  
281 metabolome. By beta-diversity measures, the effect was stronger in the metabolome, demonstrating  
282 that the drugs were altering the biochemical environment of CF mucus.

283 Microbial diversity increased with ETI therapy, indicating that the microbiome in the lungs of  
284 pwCF is becoming more complex. This increase was driven by a higher microbial evenness, a metric  
285 that contributes to the Shannon diversity, though the Shannon index itself did not reach statistical  
286 significance. Therefore, the lung microbiome of pwCF was not necessarily gaining new or losing old  
287 microbial members after ETI therapy, but those present became more similar in their relative

288 abundances, possibly an indication of greater community stability. The overall profiles of the  
289 microbiome were significantly changed after ETI therapy and did so in a similar way, as shown by the  
290 homogeneous directional movement across the first principal component axis. Despite these overall  
291 changes, there was no single organisms that significantly altered from ETI therapy after multiple-  
292 comparisons correction. This is likely due to the widely known personalization in the CF microbiome (8,  
293 39). Individuals have very different microbial profiles, so the start and endpoints from any  
294 pharmaceutical treatment may not be universal across subjects. This personalization was again  
295 observed here; subjects were still more similar to themselves after ETI therapy than to other subjects. A  
296 larger sample size in this study may have reached statistical significance for microbial taxa of interest  
297 because the trends for pathogens, such as *P. aeruginosa* and *Staphylococcus*, were showing strong  
298 reductions in abundance, while anaerobes were showing an increase. Accordingly, a collective  
299 comparison of the decrease in the log-ratio of the pathogen:anaerobe abundances did reach statistical  
300 significance. This finding validates this approach of simplifying the microbiome to these two  
301 communities and indicates that there is an overall reduction in the relative abundance of collective  
302 clinical pathogens, even though not all patients have the same pathogen. There was also a trend in the  
303 decreased bacterial load after ETI therapy, supporting that the increase in diversity seen from  
304 microbiome measures may be associated with a decrease in total bacterial load from expectorated  
305 sputum, though this too did not reach statistical significance. In summary, ETI therapy significantly  
306 altered the lung microbiome, exemplified as an increased microbial evenness driven by a reduction in  
307 the relative abundance of pathogens in place of an increase in the relative abundance of anaerobes.  
308 This increase in anaerobes may have clinical relevance for treating lung infections in the new era of  
309 highly effective CFTR modulators. The role of anaerobes within the CF lung is rather unclear as they  
310 are associated with better lung function (40), but also pulmonary exacerbations (22, 23, 41). In light of  
311 these findings, antibiotic treatment with more anaerobic coverage may be an effective approach to treat  
312 CF infections in those prescribed ETI.

313 The metabolome showed significant changes following ETI therapy, with stronger metrics than  
314 the microbiome. This was characterized by an increase in variability across subjects. Lung sputum  
315 metabolomes were relatively similar prior to ETI therapy, but, when on drug, the sputum metabolomes  
316 were highly diverse across subjects. These interesting chemical dynamics indicate that ETI induces a  
317 sort of metabolomic turmoil within the airways of pwCF, where the lung sputum biochemistry changes  
318 significantly with a highly varied outcome across individuals. However, similar to changes in the  
319 microbiome, the directionality of change was uniform, indicating a common metabolomic shift driven by  
320 ETI. Despite this variability, there were some uniform changes identified, particularly changes in  
321 peptides, amino acids, and kynurenine metabolism. The latter was identified as an important pathway

322 associated with *P. aeruginosa* dynamics from Lumacaftor/Ivacaftor therapy in a previous study (38),  
323 which the findings here and may be a universal consequence of CFTR modulator treatment. The  
324 decrease in the overall abundance of peptides, particularly dipeptides, links these metabolites to a  
325 previous study that associated them with worsening lung function (13). These peptides were shown to  
326 be sourced from neutrophil elastase activity. Thus, the decrease in these metabolites with ETI therapy  
327 may also represent a reduction in this inflammatory process, though inflammatory markers were not  
328 measured in this study. There may be a link between the decrease in kynurenine metabolism and  
329 amino acids/peptides, as it is a principal pathway for the metabolism of tryptophan in humans and  
330 bacteria. The reduction of peptides in sputum may reduce their availability for pathogens, particularly *P.*  
331 *aeruginosa*, to metabolize through the kynurenine pathway or others. The association of kynurenine  
332 metabolism with *P. aeruginosa* in a previous CFTR modulator study supports the hypothesis that this  
333 therapeutic approach may reduce these compounds and reshape the carbon source available to the  
334 pathogen.

335 Microbial metabolite vector associations further supported the changing relationship between  
336 peptides, kynurenine metabolism, and pathogens. This approach, robust to the statistical challenges of  
337 cross-omics comparisons from compositional datasets (29, 42) in addition to identifying microbiome  
338 and metabolome changes, showed that the decrease in peptides and kynurenine was associated with a  
339 reduction in pathogens. In light of this finding, we propose the hypothesis that ETI therapy, and possibly  
340 other CFTR modulators, reshape CF microbiome niche space by reducing peptide and amino acid  
341 availability. This shift may squeeze out pathogens, which are known to preferentially metabolize amino  
342 acids in CF mucus (43–46).

343 Metabolomics of complex clinical samples often identifies xenobiotics such as drugs  
344 administered to patients (14). Prior CFTR modulators were detected in the clinical samples from pwCF  
345 in this study, including evidence of diverse metabolism of these drugs, particularly ivacaftor. This  
346 created a unique opportunity to determine whether or not the presence of a previously approved CFTR  
347 modulator therapy in a patient's sputum affected the microbiome and metabolome dynamics of ETI.  
348 Interestingly, there was no difference in the microbial and metabolite dynamics described between  
349 those taking CFTR modulators and those not. This is evidence the significant changes described in this  
350 study were driven by ETI, perhaps Elexacftor itself, which is known to be a highly effective CFTR  
351 potentiator. These results show promise that ETI therapy may have a particularly strong effect on the  
352 CF sputum microbiome and metabolome where other CFTR modulators have not (33–36).

353 There are several caveats to our study, perhaps most importantly, ETI therapy is known to  
354 reduce sputum production in pwCF. It is difficult to discern if the changes we identified here are due to  
355 sputum chemical and microbial dynamics or a change in the ability to produce sputum when on CFTR

356 modulators. Instructions for expectoration were not varied before and after ETI to normalize the  
357 sampling approach and all subjects in this study were able to produce sputum for collection both prior  
358 to and during ETI therapy. Furthermore, the relatively small sample size may have masked some  
359 specific changes, particularly with individual microbial ASVs. Larger studies of pwCF before and after  
360 ETI therapy are warranted, though with the wide availability of these CFTR modulators currently makes  
361 collecting ETI naïve sample difficult. Harvesting sputum samples for CF biobanks could be an effective  
362 alternative. Finally, as with all untargeted metabolomics methods, a single protocol for metabolite  
363 extraction and mass spectrometry analysis identifies only a fraction of the total metabolite pool. Future  
364 studies on the metabolome of CF sputum in response to ETI therapy with more varied protocols may  
365 reveal other important pathways that are altered by these drugs.

366 This study shows that the highly effective CF triple therapy ETI induces significant changes in  
367 the CF sputum microbiome and metabolome. This is exemplified by an overall reduction in pathogens  
368 compared to anaerobes in addition to reduced amino acid availability and kynurenine metabolism with  
369 therapy. This shows promise for the future of CF infection therapeutics because if pathogens are  
370 decreasing in abundance in place of anaerobes, antimicrobial therapy can be targeted to these  
371 organisms that may have less intrinsic resistance than notorious pathogens, such as *P. aeruginosa* and  
372 *S. aureus*.

373  
374 **Acknowledgements:** The authors would like to thank the Spectrum Health and UC San Diego clinical  
375 teams who assisted with sample and metadata collection for this study. We would like to acknowledge  
376 funding from the National Institutes of Allergy and Infectious Diseases under R01 grant R01AI145925  
377 awarded to PI Quinn.

378

## 379 **References**

- 380 1. J. C. Davies, E. W. F. W. Alton, A. Bush, Cystic fibrosis, *BMJ* **335**, 1255–1259 (2007).
- 381 2. J. Zielenski, Genotype and Phenotype in Cystic Fibrosis, *Respiration* **67**, 117–133 (2000).
- 382 3. R. K. Rowntree, A. Harris, The phenotypic consequences of CFTR mutations., *Ann. Hum. Genet.* **67**,  
383 471–85 (2003).
- 384 4. B. Coburn, P. W. Wang, J. Diaz Caballero, S. T. Clark, V. Brahma, S. Donaldson, Y. Zhang, A.  
385 Surendra, Y. Gong, D. Elizabeth Tullis, Y. C. W. Yau, V. J. Waters, D. M. Hwang, D. S. Guttman, Lung  
386 microbiota across age and disease stage in cystic fibrosis, *Sci. Rep.* **5**, 10241 (2015).
- 387 5. L. Delhaes, S. Monchy, E. Fréalle, C. Hubans, J. Salleron, S. Leroy, A. Prevotat, F. Wallet, B.  
388 Wallaert, E. Dei-Cas, T. Sime-Ngando, M. Chabé, E. Viscogliosi, The airway microbiota in cystic  
389 fibrosis: a complex fungal and bacterial community--implications for therapeutic management., *PLoS*

- 390 *One* **7**, e36313 (2012).
- 391 6. H. R. Rabin, M. G. Surette, The cystic fibrosis airway microbiome., *Curr. Opin. Pulm. Med.* **18**, 622–7  
392 (2012).
- 393 7. Y. W. Lim, R. Schmieder, M. Haynes, D. Willner, M. Furlan, M. Youle, K. Abbott, R. Edwards, J.  
394 Evangelista, D. Conrad, F. Rohwer, Metagenomics and metatranscriptomics: Windows on CF-  
395 associated viral and microbial communities., *J. Cyst. Fibros.* **12**, 154–164 (2013).
- 396 8. J. Zhao, P. D. Schloss, L. M. Kalikin, L. a Carmody, B. K. Foster, J. F. Petrosino, J. D. Cavalcoli, D.  
397 R. VanDevanter, S. Murray, J. Z. Li, V. B. Young, J. J. LiPuma, Decade-long bacterial community  
398 dynamics in cystic fibrosis airways., *Proc. Natl. Acad. Sci. U. S. A.* **109**, 5809–14 (2012).
- 399 9. D. J. Hassett, M. D. Sutton, M. J. Schurr, A. B. Herr, C. C. Caldwell, J. O. Matu, *Pseudomonas*  
400 *aeruginosa* hypoxic or anaerobic biofilm infections within cystic fibrosis airways., *Trends Microbiol.* **17**,  
401 130–8 (2009).
- 402 10. R. Manzenreiter, F. Kienberger, V. Marcos, K. Schilcher, W. D. Krautgartner, A. Obermayer, M.  
403 Huml, W. Stoiber, A. Hector, M. Griese, M. Hannig, M. Studnicka, L. Vitkov, D. Hartl, Ultrastructural  
404 characterization of cystic fibrosis sputum using atomic force and scanning electron microscopy., *J.*  
405 *Cyst. Fibros.* **11**, 84–92 (2012).
- 406 11. D. W. Reid, N. Misso, S. Aggarwal, P. J. Thompson, E. H. Walters, Oxidative stress and lipid-  
407 derived inflammatory mediators during acute exacerbations of cystic fibrosis, *Respirology* **12**, 63–69  
408 (2007).
- 409 12. J. Yang, J. P. Eiserich, C. E. Cross, B. M. Morrissey, B. D. Hammock, Metabolomic profiling of  
410 regulatory lipid mediators in sputum from adult cystic fibrosis patients., *Free Radic. Biol. Med.* **53**, 160–  
411 71 (2012).
- 412 13. R. A. Quinn, S. Adem, R. H. Mills, W. Comstock, L. DeRight Goldasich, G. Humphrey, A. A.  
413 Aksenov, A. V. Melnik, R. da Silva, G. Ackermann, N. Bandeira, D. J. Gonzalez, D. Conrad, A. J.  
414 O'Donoghue, R. Knight, P. C. Dorrestein, Neutrophilic proteolysis in the cystic fibrosis lung correlates  
415 with a pathogenic microbiome, *Microbiome* **7**, 23 (2019).
- 416 14. R. A. Quinn, V. V Phelan, K. L. Whiteson, N. Garg, B. A. Bailey, Y. W. Lim, D. J. Conrad, P. C.  
417 Dorrestein, F. L. Rohwer, Microbial, host and xenobiotic diversity in the cystic fibrosis sputum  
418 metabolome, *ISME J.* **10**, 1483–1498 (2015).
- 419 15. C. Bear, A therapy for most with cystic fibrosis, *Cell* **180**, 211 (2020).
- 420 16. K. Ridley, M. Condren, Elexacaftor-Tezacaftor-Ivacaftor: The First Triple-Combination Cystic  
421 Fibrosis Transmembrane Conductance Regulator Modulating Therapy, *J. Pediatr. Pharmacol. Ther.* **25**,  
422 192–197 (2020).
- 423 17. H. G. M. Heijerman, E. F. McKone, D. G. Downey, E. Van Braeckel, S. M. Rowe, E. Tullis, M. A.

- 424 Mall, J. J. Welter, B. W. Ramsey, C. M. McKee, G. Marigowda, S. M. Moskowitz, D. Waltz, P. R.  
425 Sosnay, C. Simard, N. Ahluwalia, F. Xuan, Y. Zhang, J. L. Taylor-Cousar, K. S. McCoy, V.-445-103 T.  
426 Group, Efficacy and safety of the elexacaftor plus tezacaftor plus ivacaftor combination regimen in  
427 people with cystic fibrosis homozygous for the F508del mutation: a double-blind, randomised, phase 3  
428 trial, *Lancet (London, England)* **394**, 1940–1948 (2019).
- 429 18. P. G. Middleton, M. A. Mall, P. Dřevínek, L. C. Lands, E. F. McKone, D. Polineni, B. W. Ramsey, J.  
430 L. Taylor-Cousar, E. Tullis, F. Vermeulen, G. Marigowda, C. M. McKee, S. M. Moskowitz, N. Nair, J.  
431 Savage, C. Simard, S. Tian, D. Waltz, F. Xuan, S. M. Rowe, R. Jain, V.-445-102 S. Group, Elexacaftor-  
432 Tezacaftor-Ivacaftor for Cystic Fibrosis with a Single Phe508del Allele, *N. Engl. J. Med.* **381**, 1809–  
433 1819 (2019).
- 434 19. A. Gonzalez, J. A. Navas-Molina, T. Kosciólek, D. McDonald, Y. Vázquez-Baeza, G. Ackermann, J.  
435 DeReus, S. Janssen, A. D. Swafford, S. B. Orchanian, J. G. Sanders, J. Shorenstein, H. Holste, S.  
436 Petrus, A. Robbins-Pianka, C. J. Brislawn, M. Wang, J. R. Rideout, E. Bolyen, M. Dillon, J. G.  
437 Caporaso, P. C. Dorrestein, R. Knight, Qiita: rapid, web-enabled microbiome meta-analysis, *Nat.*  
438 *Methods* **15**, 796–798 (2018).
- 439 20. E. Bolyen, J. R. Rideout, M. R. Dillon, N. A. Bokulich, C. Abnet, G. A. Al Ghalith, H. Alexander, E. J.  
440 Alm, M. Arumugam, Y. Bai, J. E. Bisanz, K. Bittinger, A. Brejnrod, J. Colin, C. T. Brown, B. J. Callahan,  
441 A. Mauricio, C. Rodríguez, J. Chase, E. Cope, R. Da Silva, P. C. Dorrestein, G. M. Douglas, C.  
442 Duvall, C. F. Edwardson, M. Ernst, J. Fouquier, J. M. Gauglitz, D. L. Gibson, A. Gonzalez, G. A.  
443 Huttley, S. Janssen, A. K. Jarmusch, B. D. Kaehler, K. Bin Kang, C. R. Keefe, P. Keim, S. T. Kelley, R.  
444 Ley, E. Lofffield, C. Marotz, B. Martin, D. McDonald, L. J. Mciver, V. Alexey, J. L. Metcalf, S. C. Morgan,  
445 J. T. Morton, A. T. Naimey, QIIME 2: Reproducible , interactive , scalable , and extensible microbiome  
446 data science, *PeerJ Prepr.* (2018), doi:10.7287/peerj.preprints.27295v2.
- 447 21. A. Amir, D. McDonald, J. A. Navas-Molina, E. Kopylova, J. T. Morton, Z. Zech Xu, E. P. Kightley, L.  
448 R. Thompson, E. R. Hyde, A. Gonzalez, R. Knight, Deblur Rapidly Resolves Single-Nucleotide  
449 Community Sequence Patterns, *mSystems* **2** (2017) (available at  
450 <http://msystems.asm.org/content/2/2/e00191-16>).
- 451 22. R. Raghuvanshi, K. Vasco, Y. Vázquez-Baeza, L. Jiang, J. T. Morton, D. Li, A. Gonzalez, L.  
452 DeRight Goldasich, G. Humphrey, G. Ackermann, A. D. Swafford, D. Conrad, R. Knight, P. C.  
453 Dorrestein, R. A. Quinn, N. Chia, Ed. High-Resolution Longitudinal Dynamics of the Cystic Fibrosis  
454 Sputum Microbiome and Metabolome through Antibiotic Therapy, *mSystems* **5**, e00292-20 (2020).
- 455 23. L. A. Carmody, L. J. Caverly, B. K. Foster, M. A. M. Rogers, L. M. Kalikin, R. H. Simon, D. R.  
456 VanDevanter, J. J. LiPuma, S. H. Chotirmall, Ed. Fluctuations in airway bacterial communities  
457 associated with clinical states and disease stages in cystic fibrosis, *PLoS One* **13**, e0194060 (2018).

- 458 24. T. Pluskal, S. Castillo, A. Villar-Briones, M. Orešič, MZmine 2: Modular framework for processing,  
459 visualizing, and analyzing mass spectrometry-based molecular profile data, *BMC Bioinformatics* **11**,  
460 395 (2010).
- 461 25. M. Wang, J. J. Carver, V. V. Phelan, L. M. Sanchez, N. Garg, Y. Peng, D. D. Nguyen, J. Watrous,  
462 C. A. Kapon, T. Luzzatto-Knaan, C. Porto, A. Bouslimani, A. V. Melnik, M. J. Meehan, W.-T. Liu, M.  
463 Crüsemann, P. D. Boudreau, E. Esquenazi, M. Sandoval-Calderón, R. D. Kersten, L. A. Pace, R. A.  
464 Quinn, K. R. Duncan, C.-C. Hsu, D. J. Floros, R. G. Gavilan, K. Kleigrewe, T. Northen, R. J. Dutton, D.  
465 Parrot, E. E. Carlson, B. Aigle, C. F. Michelsen, L. Jelsbak, C. Sohlenkamp, P. Pevzner, A. Edlund, J.  
466 McLean, J. Piel, B. T. Murphy, L. Gerwick, C.-C. Liaw, Y.-L. Yang, H.-U. Humpf, M. Maansson, R. A.  
467 Keyzers, A. C. Sims, A. R. Johnson, A. M. Sidebottom, B. E. Sedio, A. Klitgaard, C. B. Larson, C. A. P.  
468 Boya, D. Torres-Mendoza, D. J. Gonzalez, D. B. Silva, L. M. Marques, D. P. Demarque, E. Pociute, E.  
469 C. O'Neill, E. Briand, E. J. N. Helfrich, E. A. Granatosky, E. Glukhov, F. Ryffel, H. Houson, H.  
470 Mohimani, J. J. Kharbush, Y. Zeng, J. A. Vorholt, K. L. Kurita, P. Charusanti, K. L. McPhail, K. F.  
471 Nielsen, L. Vuong, M. Elfeki, M. F. Traxler, N. Engene, N. Koyama, O. B. Vining, R. Baric, R. R. Silva,  
472 S. J. Mascuch, S. Tomasi, S. Jenkins, V. Macherla, T. Hoffman, V. Agarwal, P. G. Williams, J. Dai, R.  
473 Neupane, J. Gurr, A. M. C. Rodríguez, A. Lamsa, C. Zhang, K. Dorrestein, B. M. Duggan, J. Almaliti,  
474 P.-M. Allard, P. Phapale, L.-F. Nothias, T. Alexandrov, M. Litaudon, J.-L. Wolfender, J. E. Kyle, T. O.  
475 Metz, T. Peryea, D.-T. Nguyen, D. VanLeer, P. Shinn, A. Jadhav, R. Müller, K. M. Waters, W. Shi, X.  
476 Liu, L. Zhang, R. Knight, P. R. Jensen, B. Ø. Palsson, K. Pogliano, R. G. Lington, M. Gutiérrez, N. P.  
477 Lopes, W. H. Gerwick, B. S. Moore, P. C. Dorrestein, N. Bandeira, Sharing and community curation of  
478 mass spectrometry data with Global Natural Products Social Molecular Networking, *Nat. Biotechnol.* **34**  
479 (2016), doi:10.1038/nbt.3597.
- 480 26. K. Dührkop, M. Fleischauer, M. Ludwig, A. A. Aksenov, A. V. Melnik, M. Meusel, P. C. Dorrestein, J.  
481 Rousu, S. Böcker, SIRIUS 4: a rapid tool for turning tandem mass spectra into metabolite structure  
482 information, *Nat. Methods* **16**, 299–302 (2019).
- 483 27. Y. Vázquez-Baeza, M. Pirrung, A. Gonzalez, R. Knight, EMPERor: a tool for visualizing high-  
484 throughput microbial community data., *Gigascience* **2**, 16 (2013).
- 485 28. L. Breiman, Random Forests, *Mach. Learn.* **45**, 5–32 (2001).
- 486 29. J. T. Morton, A. A. Aksenov, L. F. Nothias, J. R. Foulds, R. A. Quinn, M. H. Badri, T. L. Swenson,  
487 M. W. Van Goethem, T. R. Northen, Y. Vazquez-Baeza, M. Wang, N. A. Bokulich, A. Watters, S. J.  
488 Song, R. Bonneau, P. C. Dorrestein, R. Knight, Learning representations of microbe–metabolite  
489 interactions, *Nat. Methods* , 1–9 (2019).
- 490 30. F. Reyes-Ortega, F. Qiu, E. K. Schneider-Futschik, Multiple Reaction Monitoring Mass  
491 Spectrometry for the Drug Monitoring of Ivacaftor, Tezacaftor, and Elexacaftor Treatment Response in

- 492 Cystic Fibrosis: A High-Throughput Method, *ACS Pharmacol. Transl. Sci.* **3**, 987–996 (2020).
- 493 31. N. J. Ronan, G. G. Einarsson, M. Twomey, D. Mooney, D. Mullane, M. NiChroinin, G. O'Callaghan,  
494 F. Shanahan, D. M. Murphy, O. J. O'Connor, C. A. Shortt, M. M. Tunney, J. A. Eustace, M. M. Maher,  
495 J. S. Elborn, B. J. Plant, CORK Study in Cystic Fibrosis: Sustained Improvements in Ultra-Low-Dose  
496 Chest CT Scores After CFTR Modulation With Ivacaftor, *Chest* **153**, 395–403 (2018).
- 497 32. C. Y. Ooi, S. A. Syed, L. Rossi, M. Garg, B. Needham, J. Avolio, K. Young, M. G. Surette, T.  
498 Gonska, Impact of CFTR modulation with Ivacaftor on Gut Microbiota and Intestinal Inflammation, *Sci.*  
499 *Rep.* **8**, 17834 (2018).
- 500 33. M. I. Kristensen, K. M. de Winter-de Groot, G. Berkers, M. L. J. N. Chu, K. Arp, S. Ghijsen, H. G. M.  
501 Heijerman, H. G. M. Arets, C. J. Majoor, H. M. Janssens, R. van der Meer, D. Bogaert, C. K. van der  
502 Ent, Individual and Group Response of Treatment with Ivacaftor on Airway and Gut Microbiota in  
503 People with CF and a S1251N Mutation., *J. Pers. Med.* **11** (2021), doi:10.3390/jpm11050350.
- 504 34. J. K. Harris, B. D. Wagner, E. T. Zemanick, C. E. Robertson, M. J. Stevens, S. L. Heltshe, S. M.  
505 Rowe, S. D. Sagel, Changes in Airway Microbiome and Inflammation with Ivacaftor Treatment in  
506 Patients with Cystic Fibrosis and the G551D Mutation, *Ann. Am. Thorac. Soc.* **17**, 212–220 (2019).
- 507 35. A. Y. Peleg, J. M. Choo, K. M. Langan, D. Edgeworth, D. Keating, J. Wilson, G. B. Rogers, T.  
508 Kotsimbos, Antibiotic exposure and interpersonal variance mask the effect of ivacaftor on respiratory  
509 microbiota composition, *J. Cyst. Fibros.* **17**, 50–56 (2018).
- 510 36. C. Bernarde, M. Keravec, J. Mounier, S. Gouriou, G. Rault, C. Férec, G. Barbier, G. Héry-Arnaud,  
511 Impact of the CFTR-potentiator ivacaftor on airway microbiota in cystic fibrosis patients carrying a  
512 G551D mutation., *PLoS One* **10**, e0124124 (2015).
- 513 37. S. Y. Graeber, S. Boutin, M. O. Wielpütz, C. Joachim, D. L. Frey, S. Wege, O. Sommerburg, H.-U.  
514 Kauczor, M. Stahl, A. H. Dalpke, M. A. Mall, Effects of Lumacaftor-Ivacaftor on Lung Clearance Index,  
515 Magnetic Resonance Imaging and Airway Microbiome in Phe508del Homozygous Patients with Cystic  
516 Fibrosis, *Ann. Am. Thorac. Soc.* (2021), doi:10.1513/AnnalsATS.202008-1054OC.
- 517 38. A. H. Neerincx, K. Whiteson, J. L. Phan, P. Brinkman, M. I. Abdel-Aziz, E. J. M. Weersink, J.  
518 Altenburg, C. J. Majoor, A. H. Maitland-van der Zee, L. D. J. Bos, Lumacaftor/ivacaftor changes the  
519 lung microbiome and metabolome in cystic fibrosis patients, *ERJ Open Res.* **7**, 731–2020 (2021).
- 520 39. S. V Lynch, K. D. Bruce, The cystic fibrosis airway microbiome., *Cold Spring Harb. Perspect. Med.*  
521 **3**, a009738 (2013).
- 522 40. C. Lamoureux, C.-A. Guilloux, C. Beauruelle, A. Jolivet-Gougeon, G. Héry-Arnaud, Anaerobes in  
523 cystic fibrosis patients' airways, *Crit. Rev. Microbiol.* **45**, 103–117 (2019).
- 524 41. R. A. Quinn, K. Whiteson, Y.-W. Lim, P. Salamon, B. Bailey, S. Mienardi, S. E. Sanchez, D. Blake,  
525 D. Conrad, F. Rohwer, A Winogradsky-based culture system shows an association between microbial



- 526 fermentation and cystic fibrosis exacerbation, *ISME J.* **9** (2015), doi:10.1038/ismej.2014.234.
- 527 42. G. B. Gloor, J. M. Macklaim, V. Pawlowsky-Glahn, J. J. Egozcue, Microbiome Datasets Are  
528 Compositional: And This Is Not Optional, *Front. Microbiol.* **8**, 2224 (2017).
- 529 43. J. M. Flynn, D. Niccum, J. M. Dunitz, R. C. Hunter, Evidence and Role for Bacterial Mucin  
530 Degradation in Cystic Fibrosis Airway Disease, *PLoS Pathog.* **12**, 1–21 (2016).
- 531 44. S. R. Thomas, A. Ray, M. E. Hodson, T. L. Pitt, Increased sputum amino acid concentrations and  
532 auxotrophy of *Pseudomonas aeruginosa* in severe cystic fibrosis lung disease., *Thorax* **55**, 795–7  
533 (2000).
- 534 45. A. L. BARTH, T. L. PITT, The high amino-acid content of sputum from cystic fibrosis patients  
535 promotes growth of auxotrophic *Pseudomonas aeruginosa*, *J. Med. Microbiol.* **45**, 110–119 (1996).
- 536 46. R. A. Quinn, Y. W. Lim, H. Maughan, D. Conrad, F. Rohwer, K. L. Whiteson, Biogeochemical forces  
537 shape the composition and physiology of polymicrobial communities in the cystic fibrosis lung, *MBio* **5**  
538 (2014), doi:10.1128/mBio.00956-13.

539

#### 540 **Figure Legends.**

541

542 **Fig. 1.** *Alpha and Beta-diversity of Lung microbiomes before and after ETI.* Alpha-diversity measures of  
543 a) microbiome data and b) metabolome data before (N\_ETI) and after ETI therapy. P-values shown are  
544 from either the DM t-test or WSRT after testing for normality. Principal coordinate analysis plots of beta-  
545 diversity data for c) microbiome data with significance calculated utilizing the weighted UniFrac distance  
546 and d) metabolome data with significance calculated utilizing the Bray-Curtis distance. PERMANOVA  
547 statistics and the percent of variance explained by each axis are shown. Boxplots of positions on the  
548 first principal coordinate are shown tested for significance with the DM t-test. Beta-diversity cross  
549 comparisons within the e) microbiome and f) metabolome data. Cross comparisons were done across  
550 patients before and after ETI therapy, across the entire dataset, and within subjects before and after  
551 ETI therapy (within). Statistical significance was first tested with an ANOVA followed by an ad-hoc  
552 Tukey's test. Shared letters denote distributions that are significantly different from each other.

553

554 **Fig. 2.** *Microbiome changes throughout ETI therapy.* a) Taxonomic dynamics at the family level of  
555 ASVs in each subject before (N) and after (T) ETI therapy. b) The rRNA copies/mL of sputum, log-  
556 ration of pathogen:anaerobes and ASV dynamics before and after ETI therapy.

557

558 **Fig. 3.** *Metabolite network of peptides and other metabolite changes.* a) Molecular family metabolite  
559 abundance changes pre- and post-therapy. b) Individual metabolite changes pre- and post-therapy. c)

560 Molecular network of peptides identified by GNPS library searching. Each node represents a unique  
561 MS/MS spectrum (putative metabolite), connections between the nodes are determined and width-  
562 scaled by the cosine score from MS/MS alignment. Pie charts are the total feature abundance colored  
563 according to the legend.

564

565 **Fig. 4.** *ETI metabolism detected in sputum metabolomic data.* a) Three separate molecular networks  
566 are shown for Ivacaftor, Tezacaftor, or Elexacaftor and their related metabolic products as identified by  
567 MS/MS spectral alignments. Each node in a network represents a unique MS/MS spectrum and  
568 connections between the nodes indicate spectral similarity as identified by the cosine score. The width  
569 of the edges are scaled to the cosine score and the pie chart inside nodes represent the sum of the  
570 area-under-curve abundance of that molecule in either pre- (red) or post-treatment (blue) sputum  
571 samples. The nodes are highlighted by whether they represent parent drug, known metabolized  
572 product, or putative unknown metabolized product. Putative structures of the metabolites are shown  
573 with their molecular formulas, retention times, and exact masses. Note that the stereochemistry of  
574 some of the metabolized products cannot be discerned with this level of MS/MS annotation. b) Boxplots  
575 of the area-under-curve abundance of the three parent drugs in pre- and post-ETI samples.

576

577 **Fig. 5.** *Mmvec analysis of sputum microbiomes and metabolomes from pwCF.* a) Biplot of the  
578 metabolite and microbe vector associations. Each diamond represents a metabolite (only metabolites  
579 annotated within the GNPS library are shown) and they are colored by their molecular family. The  
580 vectors are the top 15 ASVs associated with the metabolomic dynamics and they are colored by  
581 whether or not they are considered clinical pathogens or anaerobes. b) Conditional probability  
582 distributions for the mean of all peptides identified in the dataset and their association with either  
583 anaerobes (red) or pathogens (purple, p-value from DM T-test). c) Rank abundance of the conditional  
584 probabilities of kynurenine with different anaerobes (red) and pathogens (purple) ASVs.

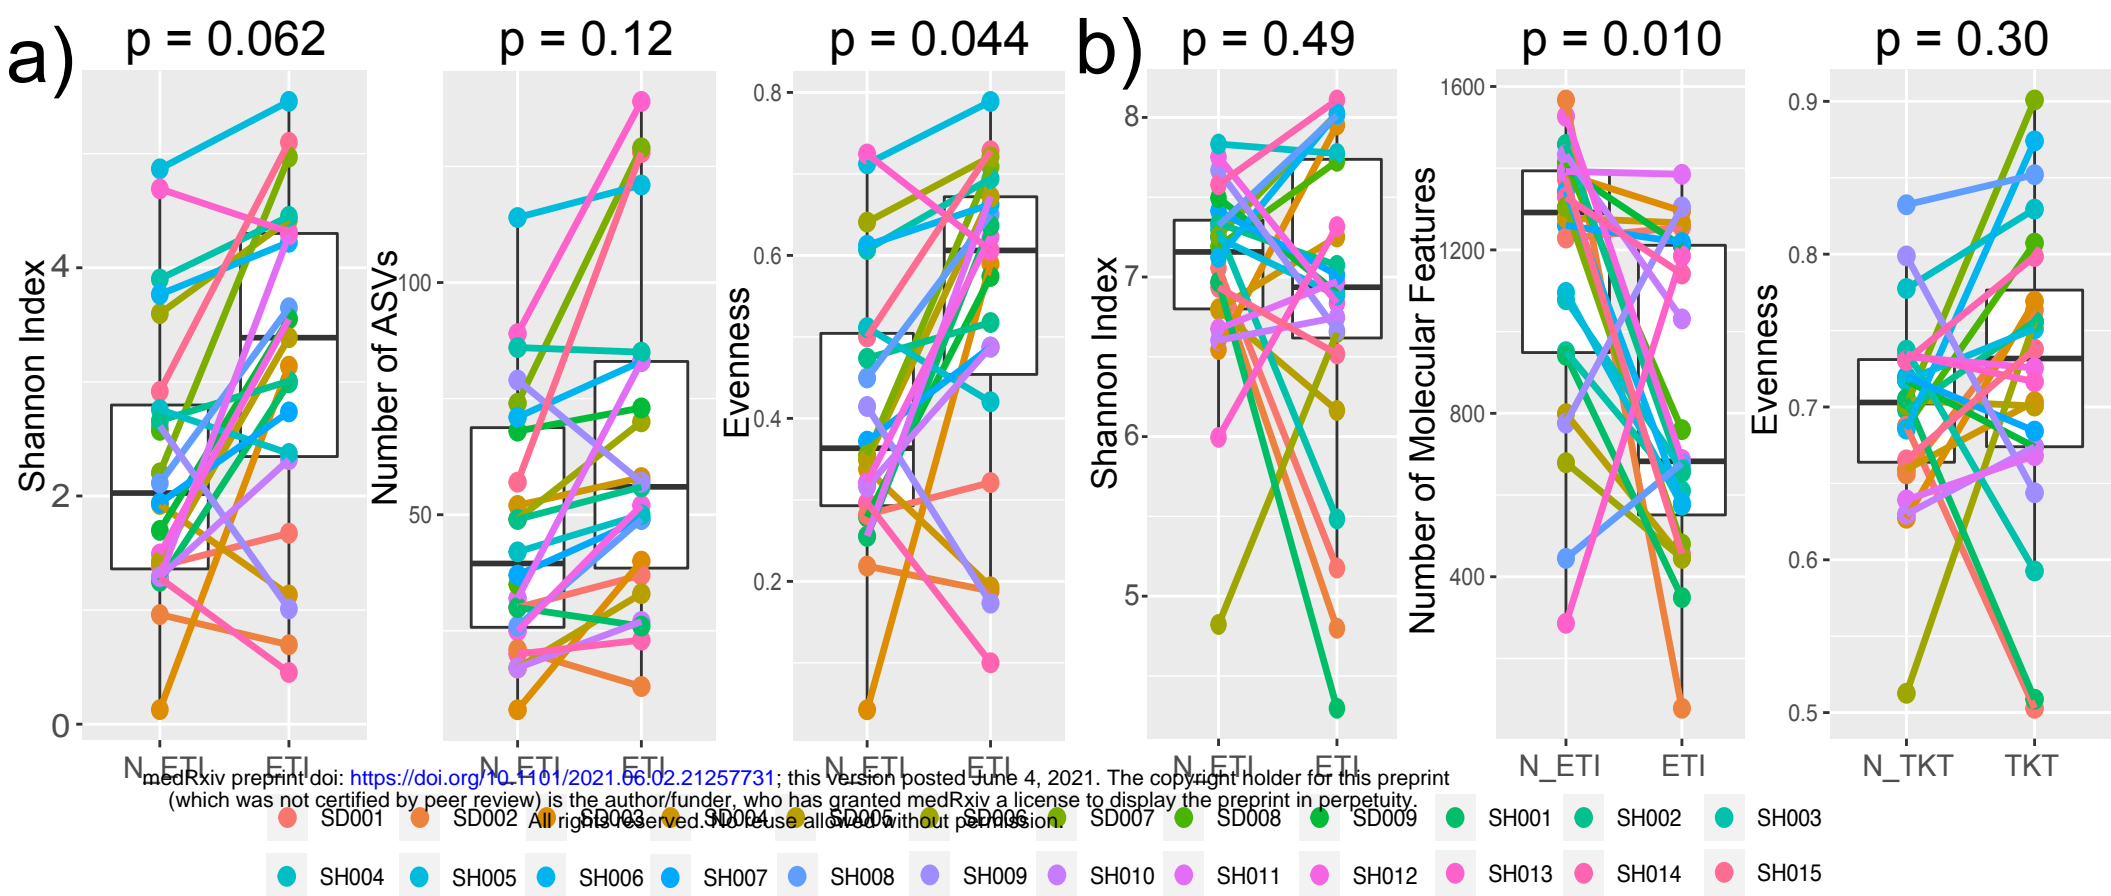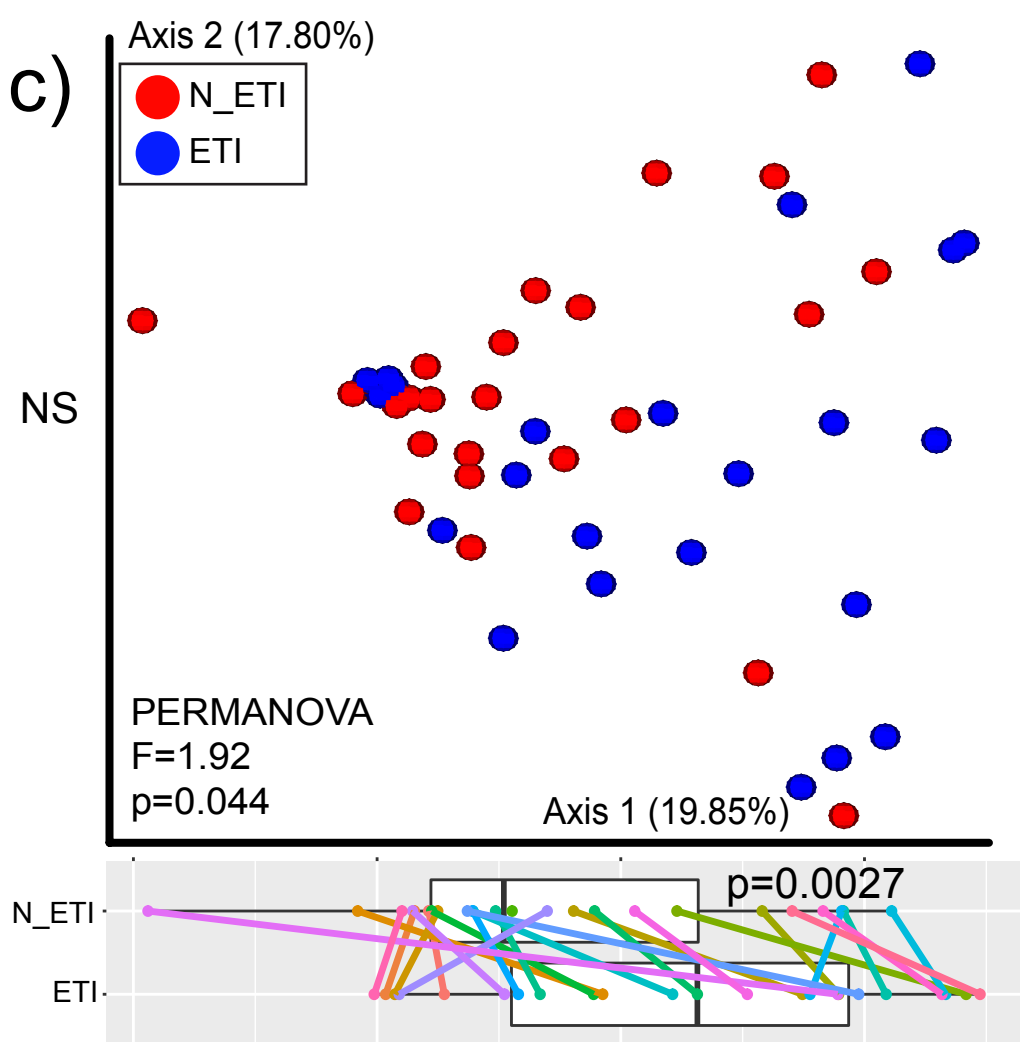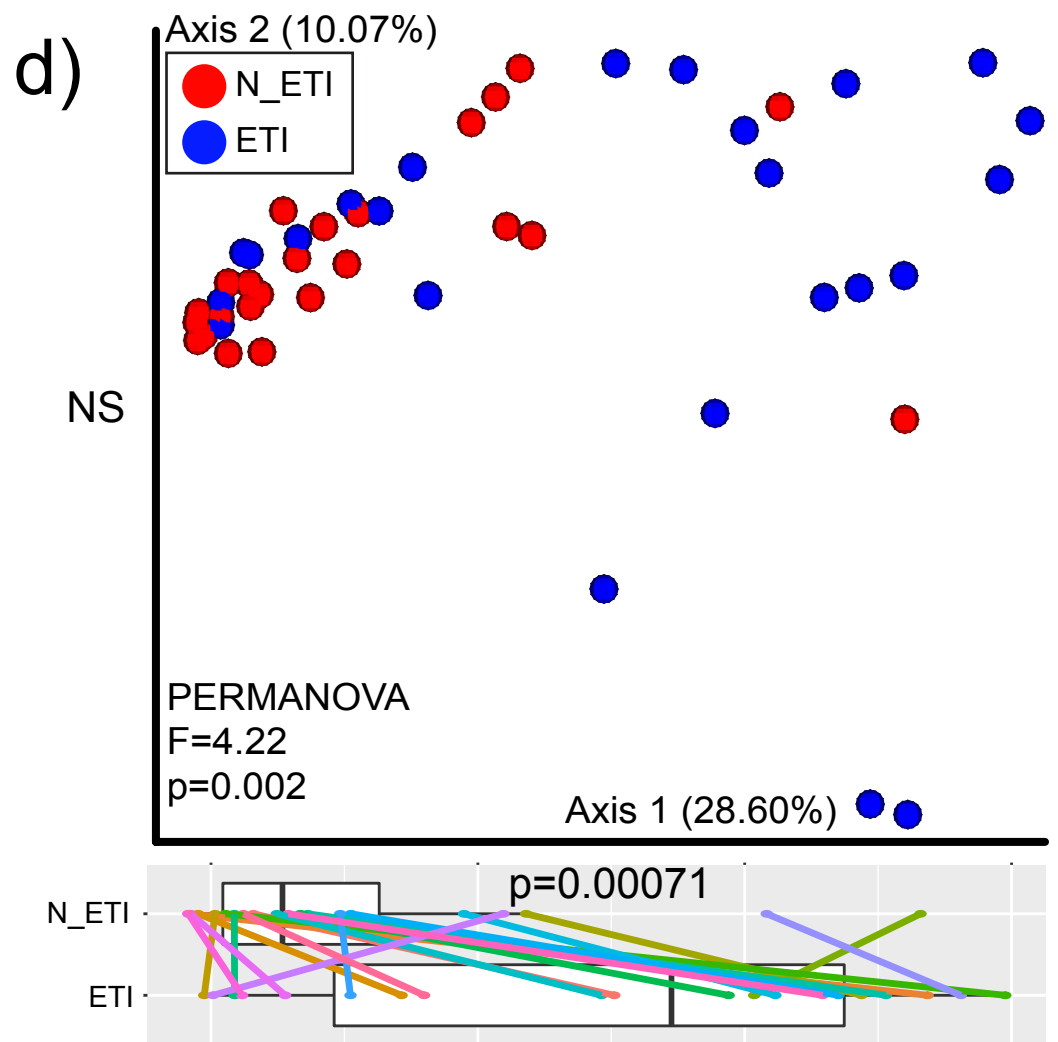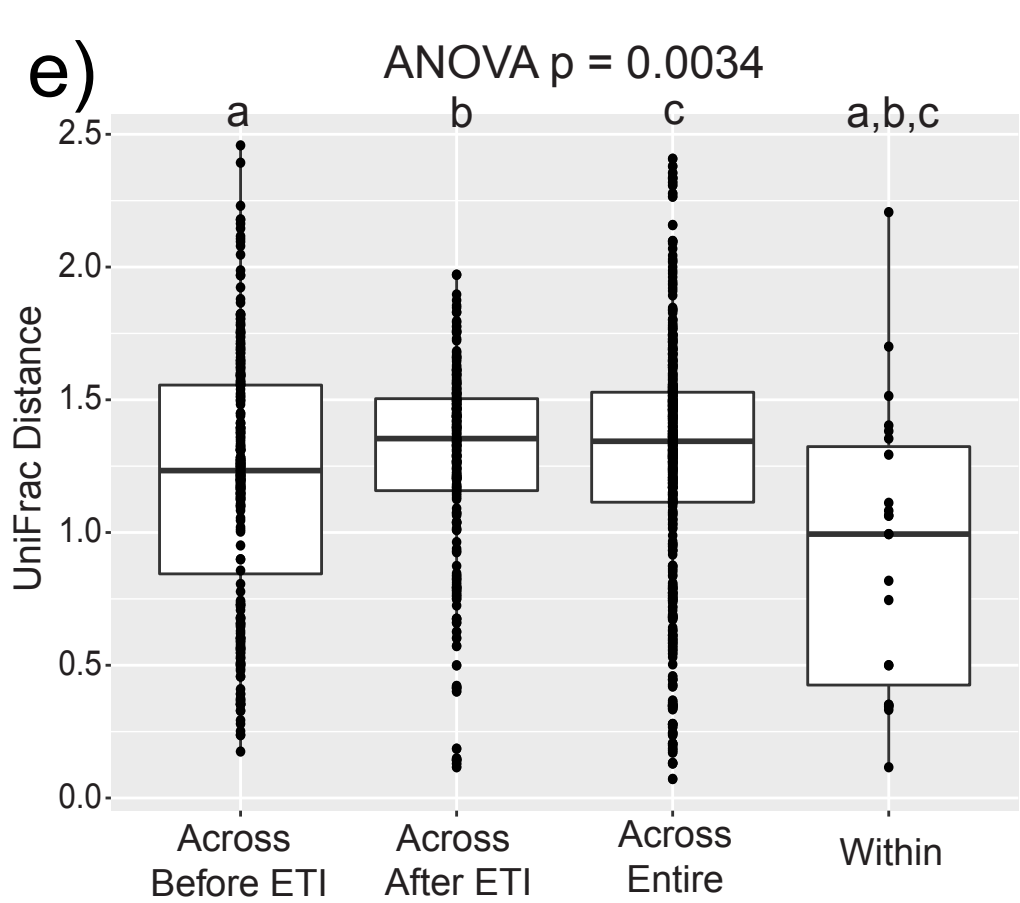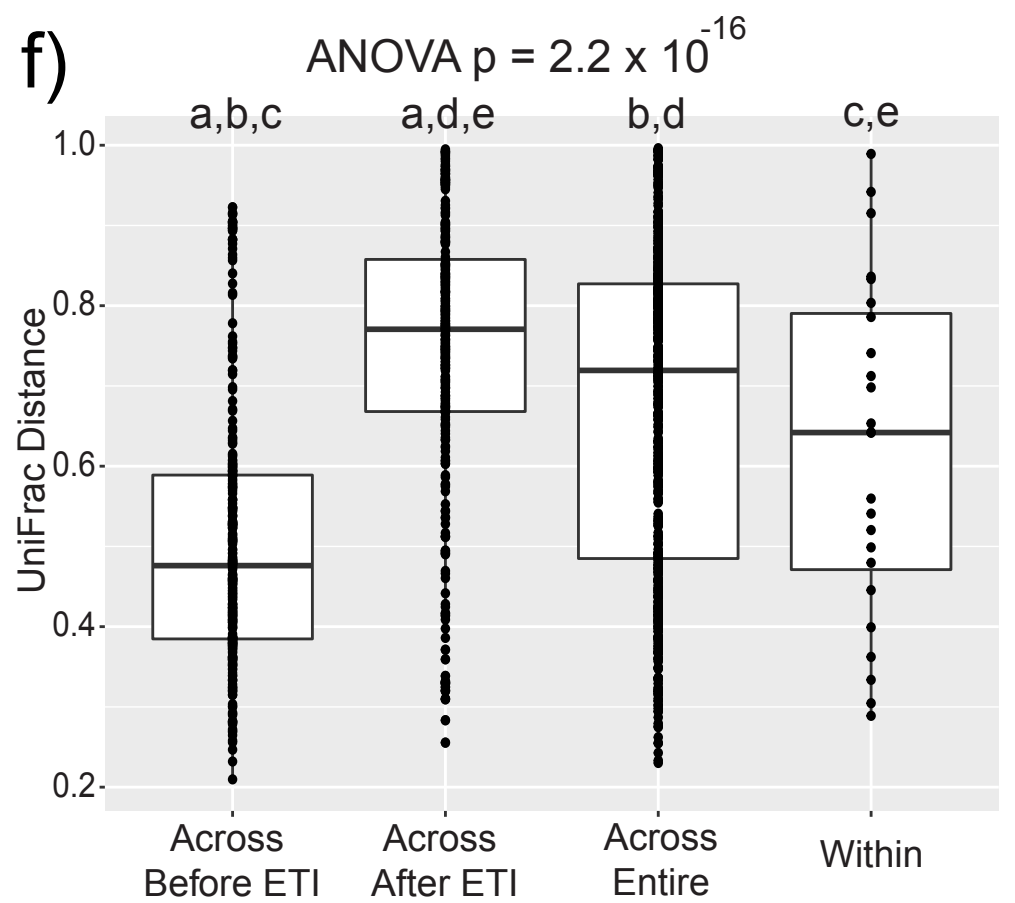

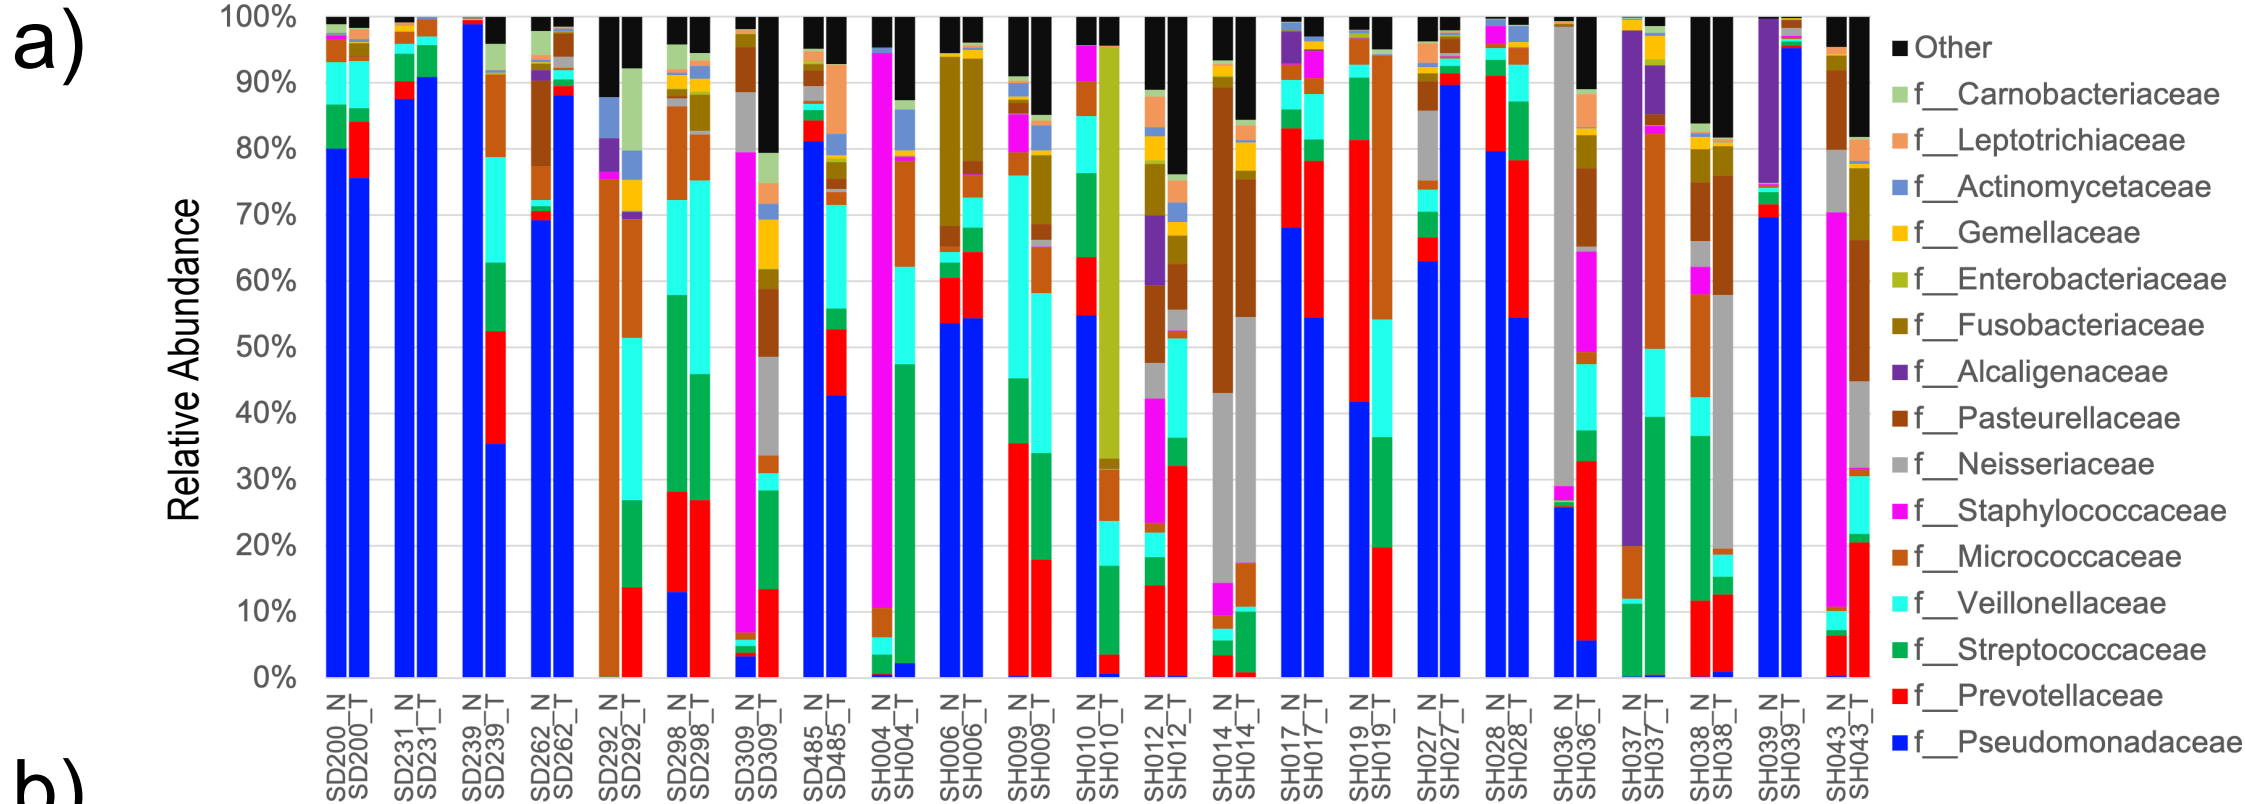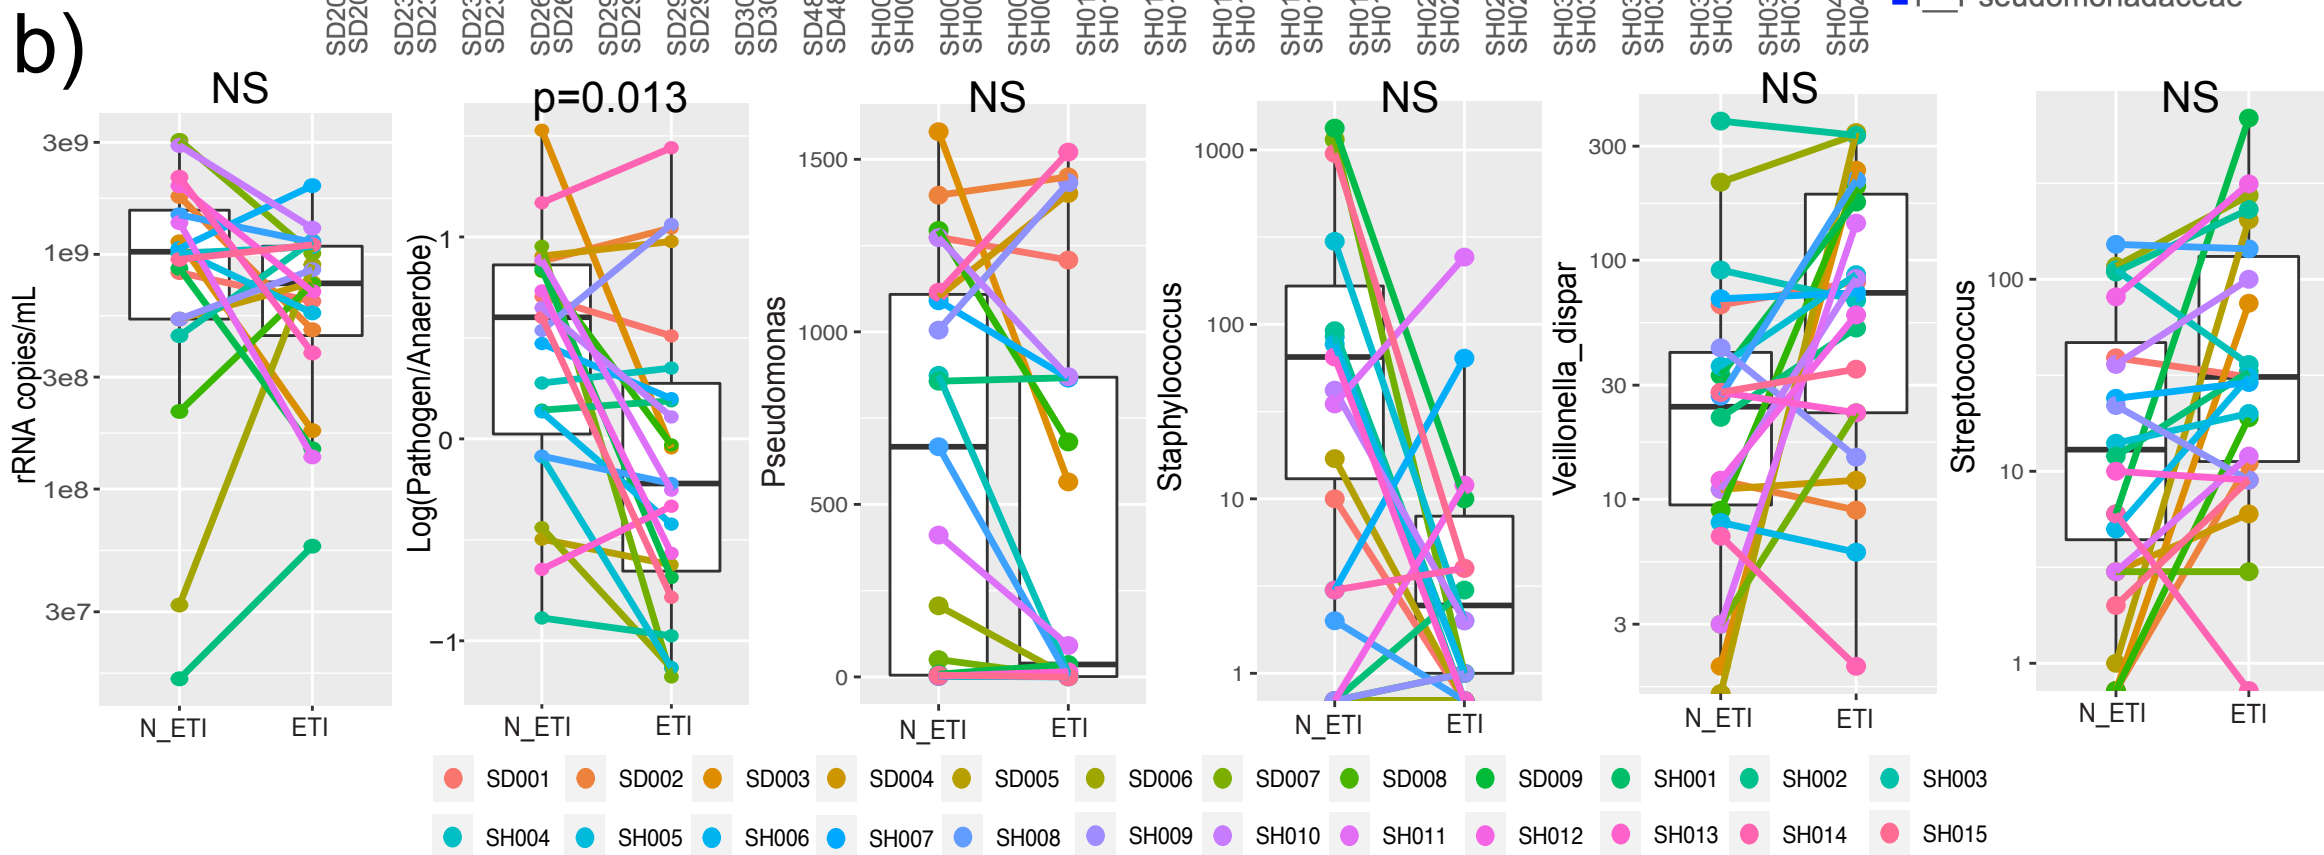

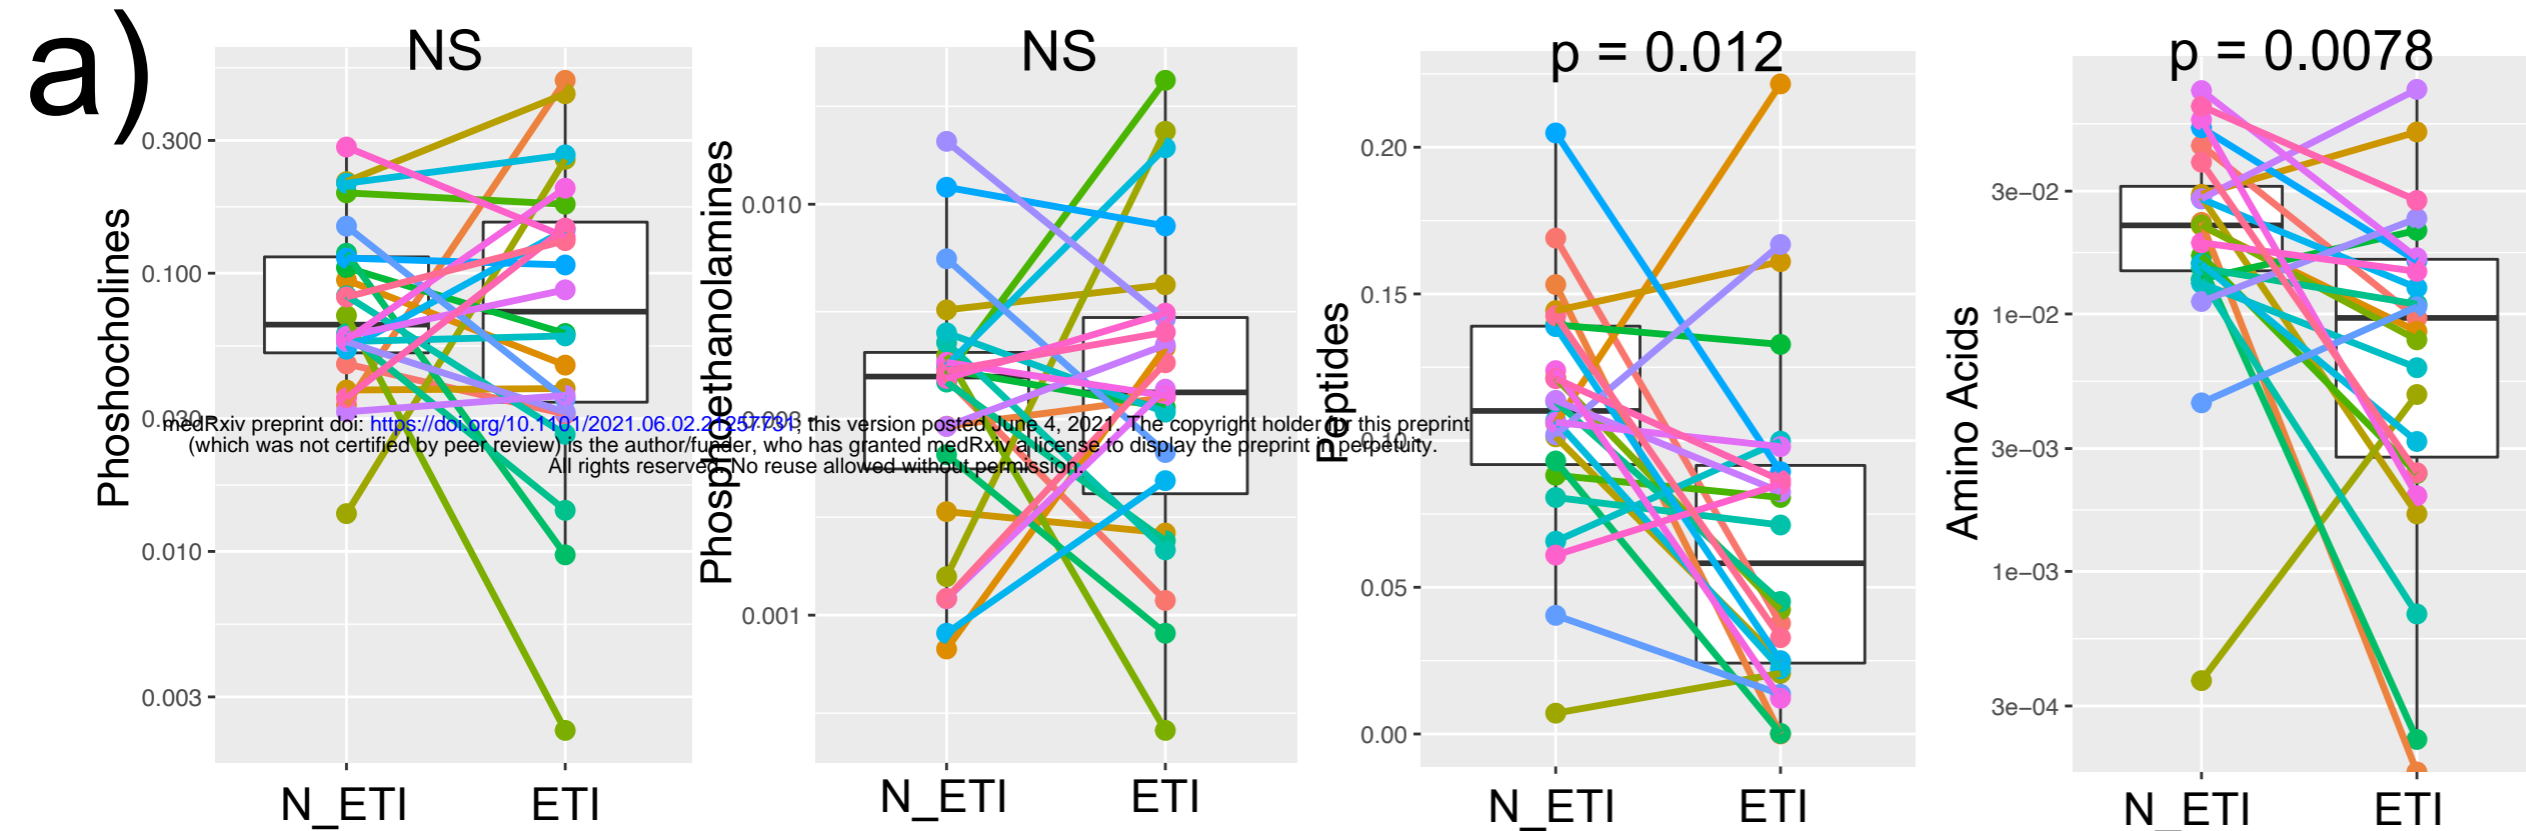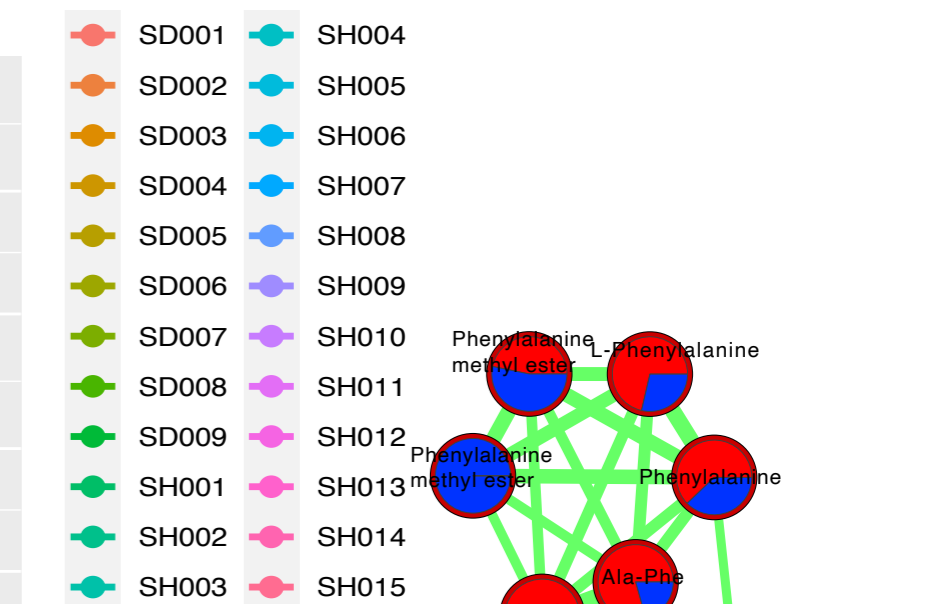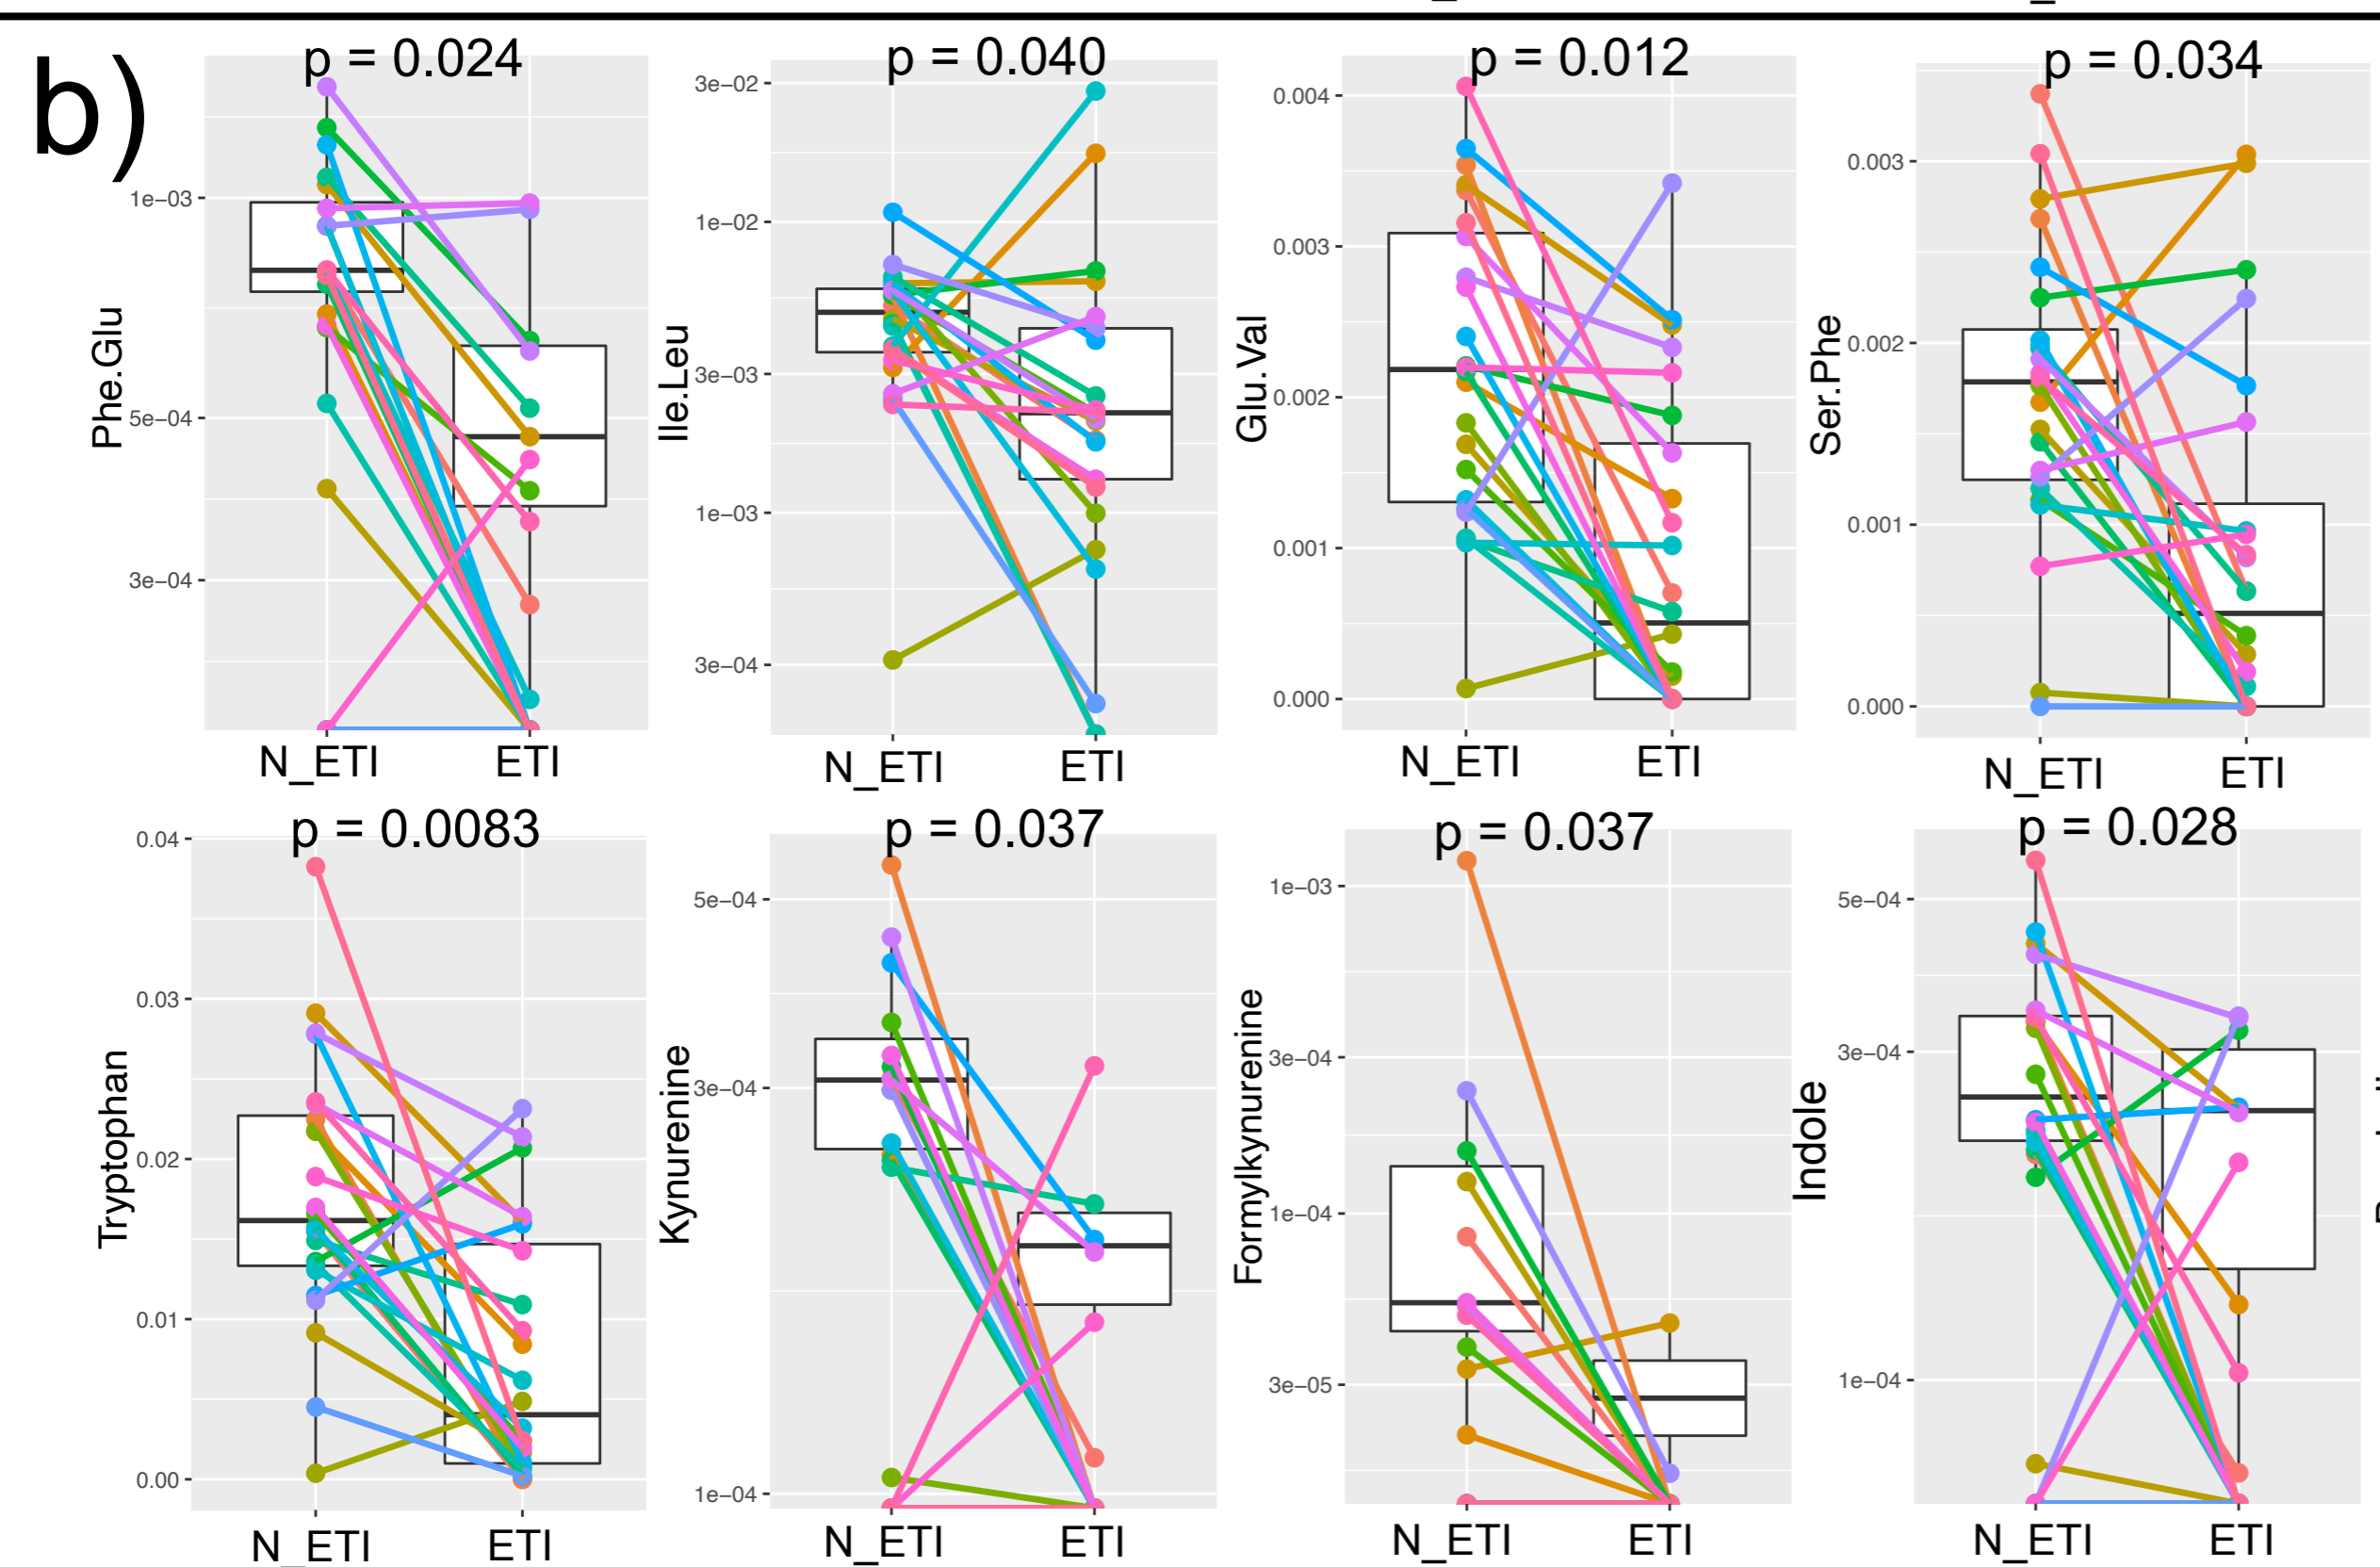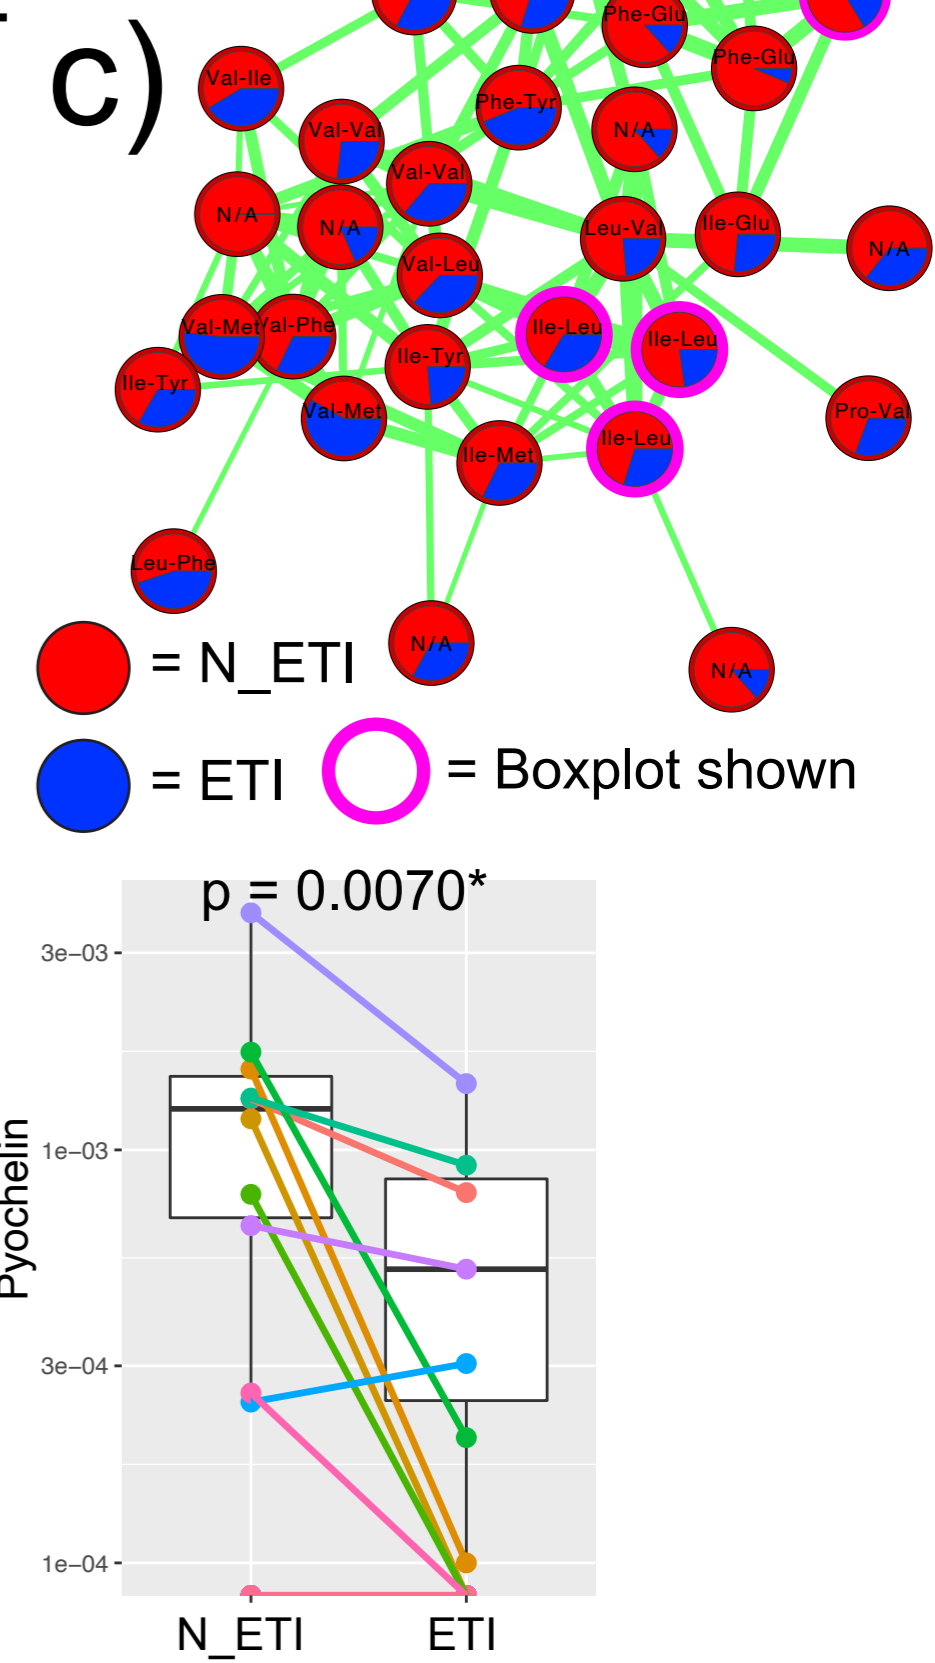

a)

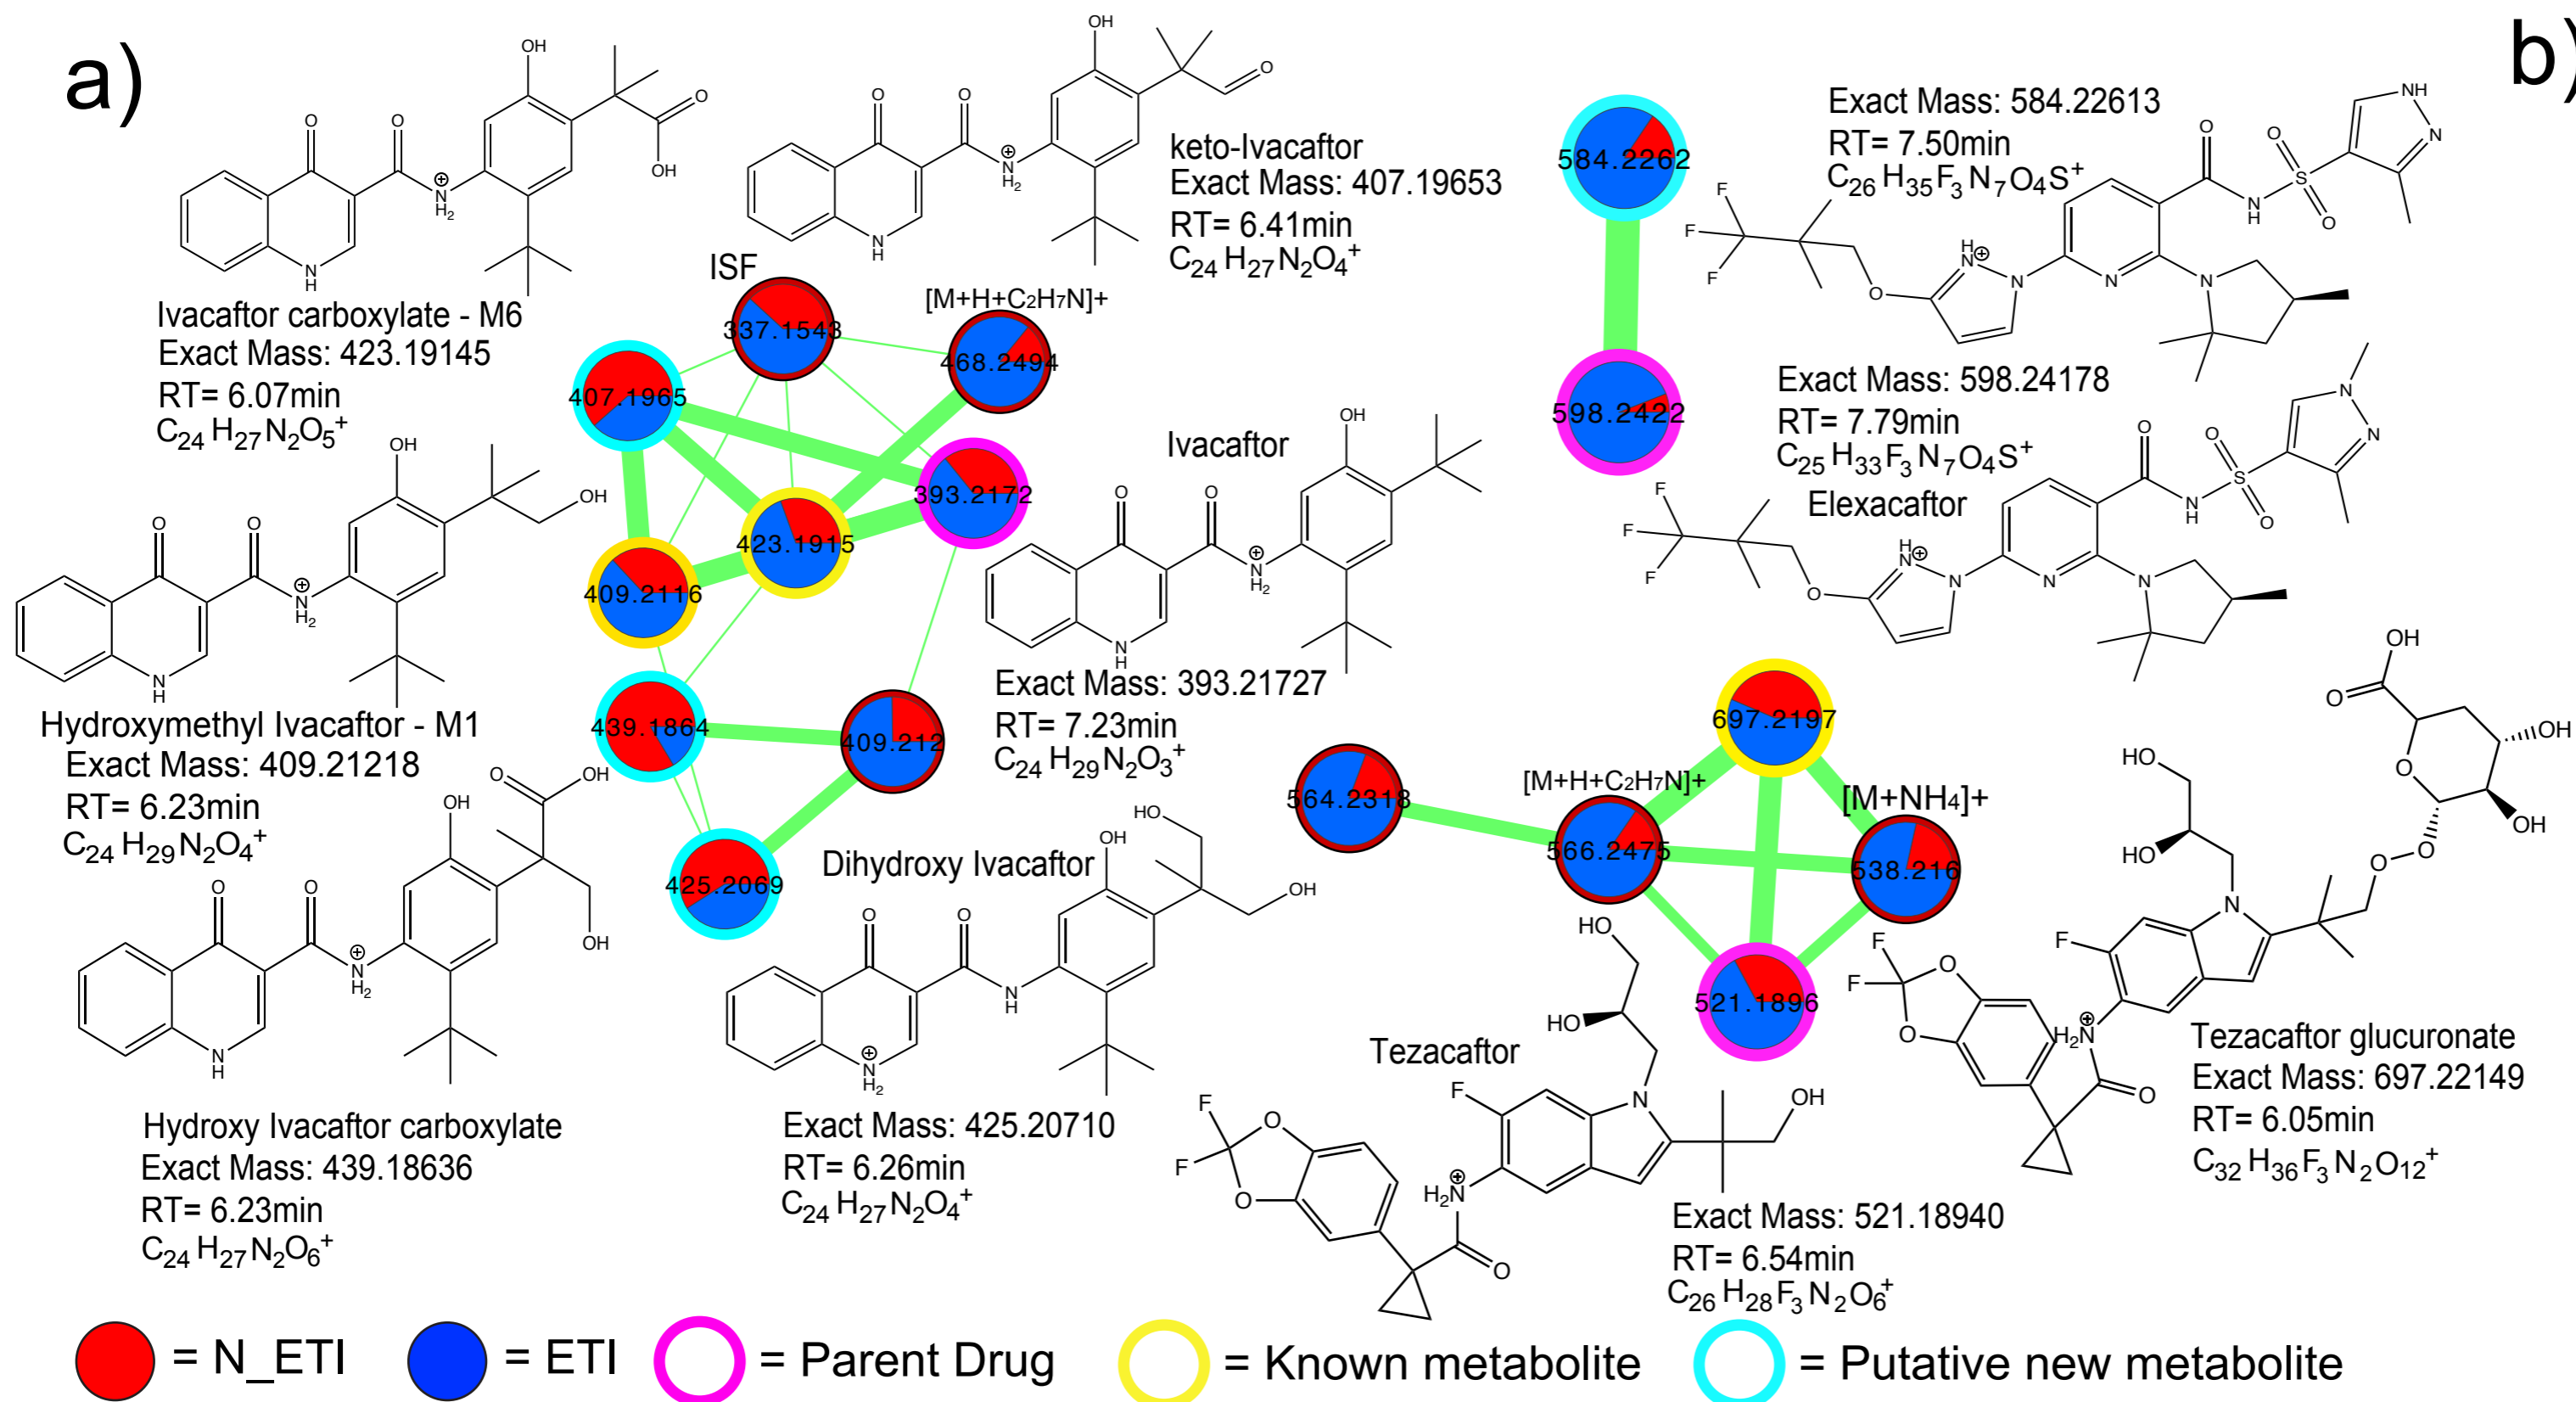

b)

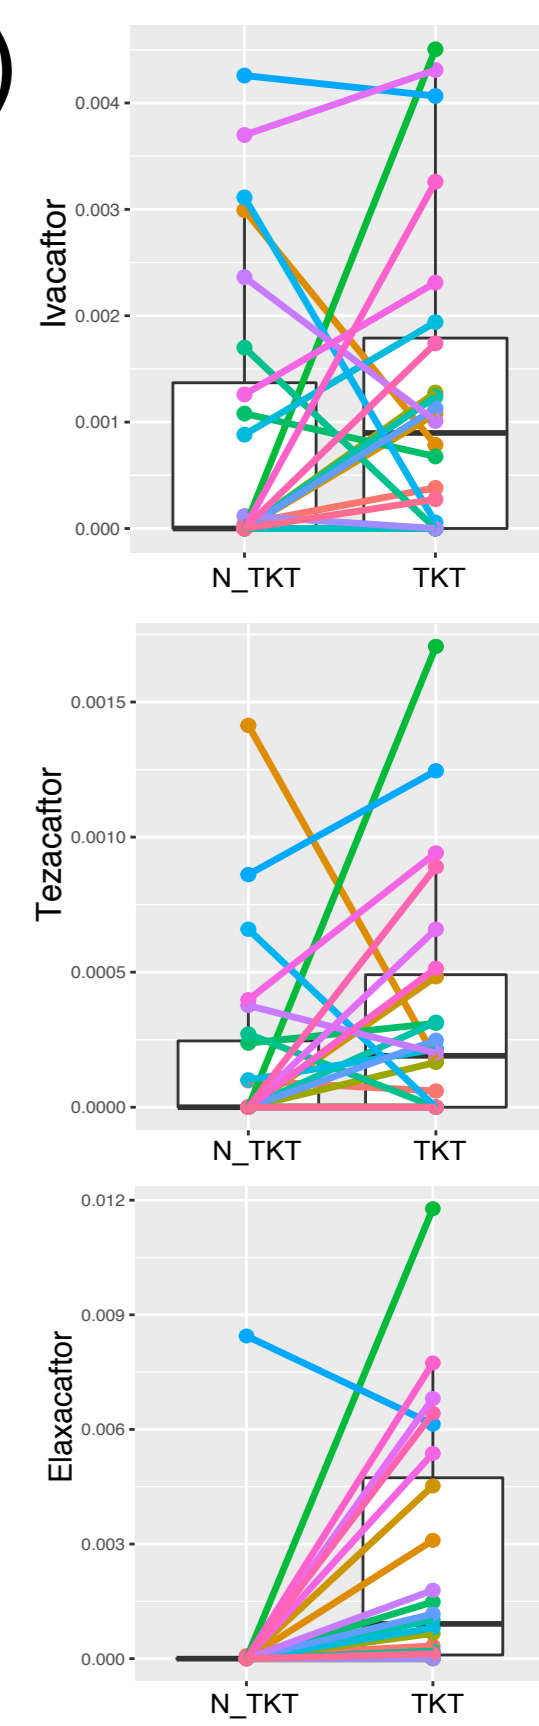

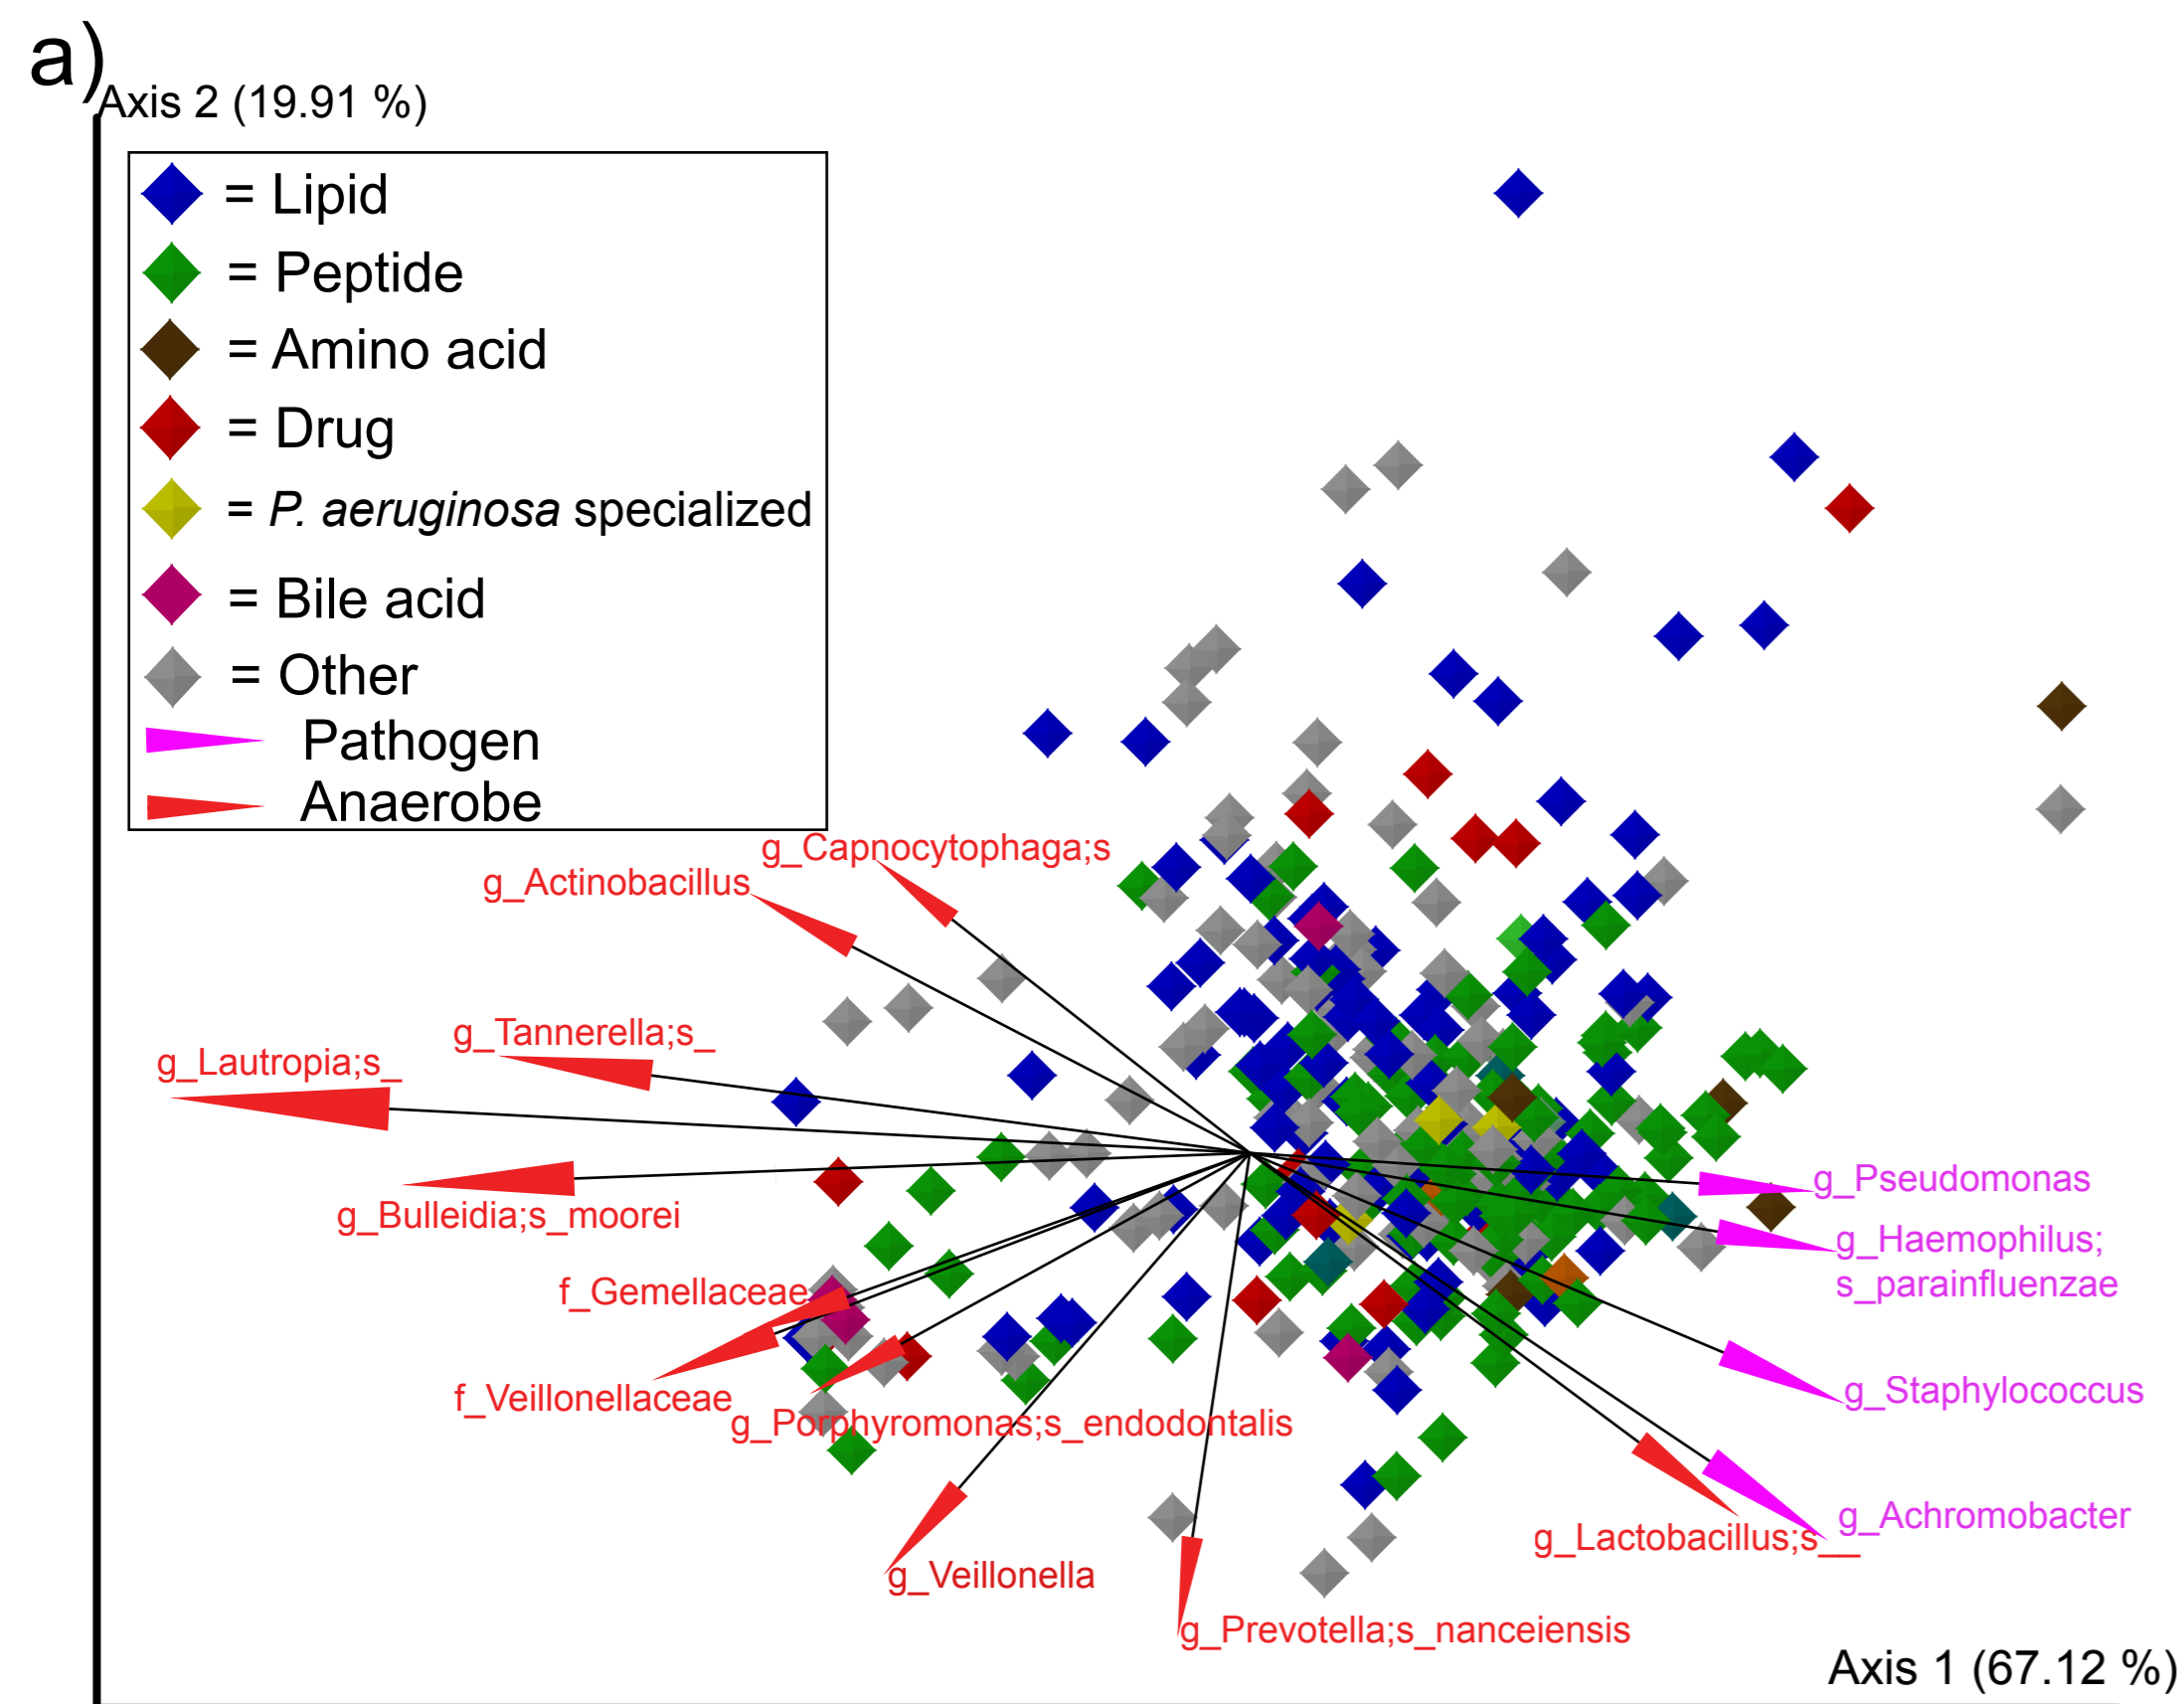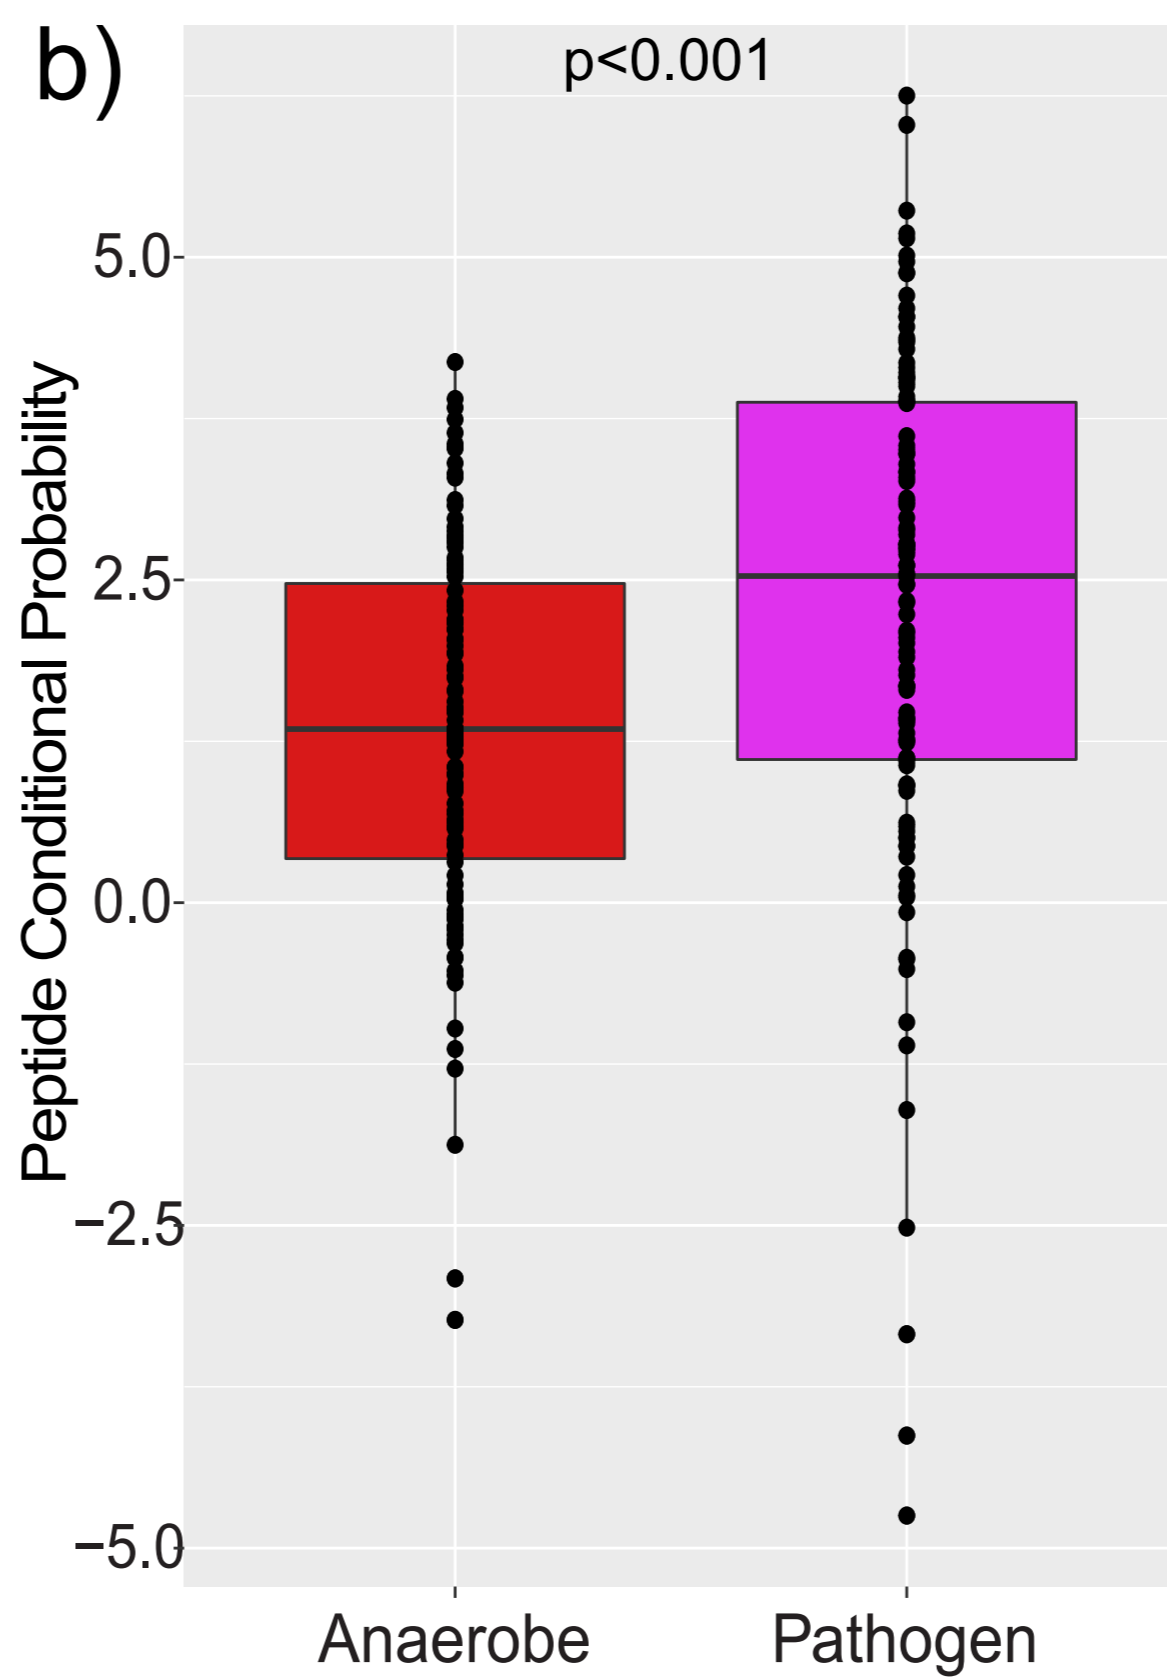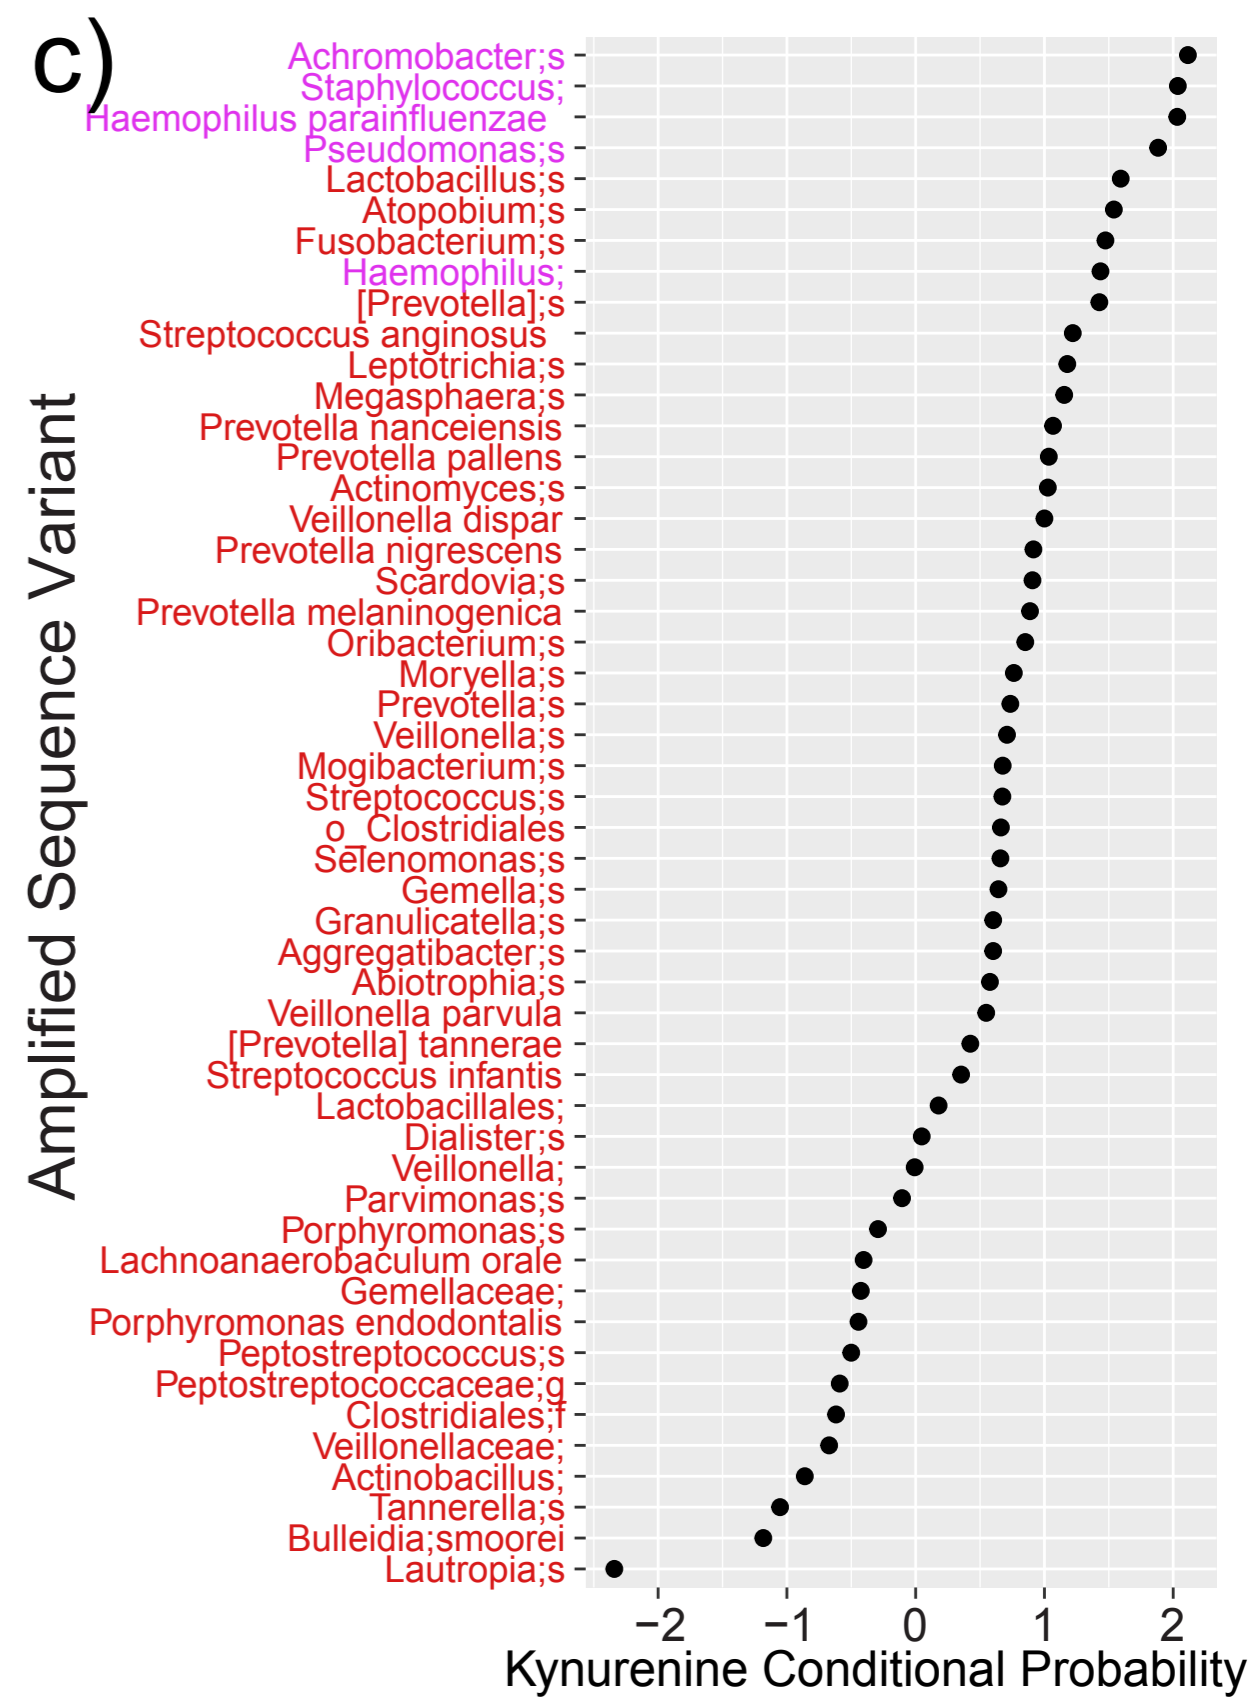

Source: https://www.medrxiv.org/content/10.1101/2021.06.02.21257731v1.full.pdf
